# Supplementary material for: Tea, coffee, and caffeine intake and risk of dementia and Alzheimer's disease: a systematic review and meta-analysis of cohort studies
Source: Royal Society of Chemistry journal article supplement (doi:10.1039/d4fo01750a), 2024-01-01
Supplement: d4fo01750a1.pdf [file d4fo01750a1.pdf]

**Tea, coffee, and caffeine intake and risk of dementia and Alzheimer's Disease: a  
systematic review and meta-analysis of observational studies**

**Supplementary Material**

## 目录

|                                                                                                                                                                                                                                                                                         |           |
|-----------------------------------------------------------------------------------------------------------------------------------------------------------------------------------------------------------------------------------------------------------------------------------------|-----------|
| <b>Supplemental Tables .....</b>                                                                                                                                                                                                                                                        | <b>3</b>  |
| Table S1. Systematic literature review search terms and strategy. ....                                                                                                                                                                                                                  | 3         |
| Table S2. The list of excluded studies during the full text screening stage .....                                                                                                                                                                                                       | 5         |
| Table S3. The category of exposures and the estimated effects of the included cohort studies on the association between tea intake and dementia and Alzheimer's Disease .....                                                                                                           | 6         |
| Table S4. Quality assessment of included cohort studies for the association of tea intake and dementia and Alzheimer's Disease .....                                                                                                                                                    | 11        |
| Table S5. Quality assessment of included cohort studies for the association of coffee intake and dementia and Alzheimer's Disease .....                                                                                                                                                 | 12        |
| Table S6. Quality assessment of included cohort studies for the association of caffeine intake and dementia and Alzheimer's Disease .....                                                                                                                                               | 13        |
| Table S7. Subgroup analysis of tea intake and risk of dementia and Alzheimer's Disease for the highest versus lowest meta-analysis. ....                                                                                                                                                | 14        |
| Table S8. Sensitivity analysis of tea intake and dementia and Alzheimer's Disease for the highest versus lowest meta-analysis .....                                                                                                                                                     | 16        |
| Table S9. Subgroup analysis of coffee intake and risk of dementia and Alzheimer's Disease for the highest versus lowest meta-analysis. ....                                                                                                                                             | 17        |
| Table S10. Sensitivity analysis of coffee intake and dementia and Alzheimer's Disease for the highest versus lowest meta-analysis .....                                                                                                                                                 | 19        |
| Table S11. Subgroup analysis of caffeine intake and risk of dementia for the highest versus lowest meta-analysis. ....                                                                                                                                                                  | 20        |
| Table S12. Sensitivity analysis of caffeine intake and dementia for the highest versus lowest meta-analysis .....                                                                                                                                                                       | 21        |
| Table S13. GRADE evidence profile for observational studies of tea, coffee, and caffeine between dementia and Alzheimer's Disease. ....                                                                                                                                                 | 22        |
| <b>Supplemental Figures.....</b>                                                                                                                                                                                                                                                        | <b>24</b> |
| Fig. S1 Funnel plots for detection of publication bias of included studies for highest vs. lowest intake meta-analysis of tea intake and risk of dementia(A)and Alzheimer's Disease (B); and for per 1 cup increase intake and risk of dementia(C)and Alzheimer's Disease (D). ....     | 25        |
| Fig. S2 Funnel plots for detection of publication bias of included studies for highest vs. lowest intake meta-analysis of coffee intake and risk of dementia(A) and Alzheimer's Disease (B); and for per 1 cup increase intake and risk of dementia(C)and Alzheimer's Disease (D). .... | 26        |
| Fig. S3 Funnel plots for detection of publication bias of included studies for highest vs. lowest intake meta-analysis of caffeine intake and risk of dementia (A)and Alzheimer's Disease (B); and for per 50 mg increase intake and risk of dementia(C). ....                          | 27        |
| <b>Reference list .....</b>                                                                                                                                                                                                                                                             | <b>28</b> |

## Supplemental Tables

**Table S1. Systematic literature review search terms and strategy.**

| <b>Search terms for PubMed (n=1221), until 11 June 2024</b>                                                                                                                                                                                                                                                                                                                                                                                                                                                                                                           |                |
|-----------------------------------------------------------------------------------------------------------------------------------------------------------------------------------------------------------------------------------------------------------------------------------------------------------------------------------------------------------------------------------------------------------------------------------------------------------------------------------------------------------------------------------------------------------------------|----------------|
| #1 ("Coffee"[Mesh]) OR ("Tea"[Mesh]) OR (coffee [Title/Abstract] OR caffeine [Title/Abstract] OR caffeinated [Title/Abstract] OR Chicory* [Title/Abstract] OR Coffea [Title/Abstract] OR 1,3,7-trimethylxanthine [Title/Abstract]) OR tea [Title/Abstract]                                                                                                                                                                                                                                                                                                            | 90078 results  |
| #2 ("Dementia"[Mesh]) OR ("Alzheimer Disease"[Mesh]) OR (Dementias[Title/Abstract] OR Cognitive Dysfunction [Title/Abstract] OR Cognitive Defect [Title/Abstract] OR Cognitive Dysfunctions [Title/Abstract] OR Cognitive Decline[Title/Abstract] OR Cognitive Declines[Title/Abstract] OR Cognitive Impairments[Title/Abstract] OR Cognitive Impairment[Title/Abstract] OR Neurocognitive Disorder[Title/Abstract] OR Neurocognitive Disorders[Title/Abstract] OR Alzheimer's Diseases[Title/Abstract] OR Alzheimer's [Title/Abstract] OR Alzheimer[Title/Abstract]) | 387693 results |
| #1 AND #2                                                                                                                                                                                                                                                                                                                                                                                                                                                                                                                                                             | 1221 results   |
| <b>Search terms for Embase (n=2406), 11 June 2024</b>                                                                                                                                                                                                                                                                                                                                                                                                                                                                                                                 |                |
| #1 'coffee'/exp OR 'coffee' OR 'tea'/exp OR 'tea' OR 'caffeine':ab,ti OR 'caffeinated':ab,ti OR 'chicory':ab,ti OR 'coffea':ab,ti OR '1,3,7-trimethylxanthine':ab,ti                                                                                                                                                                                                                                                                                                                                                                                                  | 133455 results |
| #2 'dementia'/exp OR 'dementia' OR 'alzheimer disease'/exp OR 'alzheimer disease' OR 'dementias':ab,ti OR 'cognitive defect':ab,ti OR 'cognitive dysfunction':ab,ti OR 'cognitive                                                                                                                                                                                                                                                                                                                                                                                     |                |

dysfunctions':ab,ti OR 'cognitive decline':ab,ti OR 'cognitive declines':ab,ti OR 'cognitive impairments':ab,ti OR 'cognitive impairment':ab,ti OR 'neurocognitive disorder':ab,ti OR 'neurocognitive disorders':ab,ti OR 'alzheimer diseases':ab,ti OR 'alzheimer\*':ab,ti

666856 results

#1 AND #2

2406 results

**Search terms for Web of Science (n= 1985), 11 June 2024**

TS= (("Coffee" OR "Tea" OR "caffeine" OR "Caffeinated" OR "Chicory" OR "Coffea" OR "1,3,7-trimethylxanthine") AND ("Dementia" OR "Dementias" OR "Cognitive Dysfunction" OR "Cognitive Defect" OR "Cognitive Dysfunctions" OR "Cognitive Decline" OR "Cognitive Declines" OR "Cognitive Impairments" OR "Cognitive Impairment" OR "Neurocognitive Disorder" OR "Neurocognitive Disorders" OR "Alzheimer Disease" OR "Alzheimer's Diseases" OR "Alzheimer's" OR "Alzheimer"))

1985 results

**Table S2. The list of excluded studies during the full text screening stage**

| <b>Exclusion reason</b>   | <b>Reference number</b> |
|---------------------------|-------------------------|
| Reviews, meta-analysis    | 1-85                    |
| Not the relevant exposure | 86-113                  |
| Not the relevant outcome  | 114-213                 |
| Conference                | 214-261                 |
| Not cohort study          | 262-278                 |
| Same population study     | 279-281                 |
| Not available             | 282-284                 |

References lists are attached at the end of this document.

**Table S3. The category of exposures and the estimated effects of the included cohort studies on the association between tea intake and dementia and Alzheimer's Disease**

| Author, year           | Date source (Sample size/cases)                   | Exposure               | Dementia        | AD              |
|------------------------|---------------------------------------------------|------------------------|-----------------|-----------------|
| Abbel D, 2023          | HUNT (dementia: 7381/985 AD:7381/572)             | Tea:                   |                 |                 |
|                        |                                                   | 0 cup/day              | Reference       |                 |
|                        |                                                   | 1 cup/day              | 0.92(0.74,1.16) |                 |
|                        |                                                   | 2 cups/day             | 0.92(0.74,1.14) |                 |
|                        |                                                   | ≥3 cups/day            | 1.01(0.76,1.33) |                 |
|                        |                                                   | Coffee:                |                 |                 |
|                        |                                                   | 0-1 cup/day            | Reference       | Reference       |
|                        |                                                   | 2-3 cups/day           | 1.11(0.81,1.51) | 1.15(0.83,1.58) |
|                        |                                                   | 4-5 cups/day           | 0.94(0.69,1.28) | 1.37(0.96,1.95) |
|                        |                                                   | 6-7 cups/day           | 1.04(0.74,1.46) | 1.85(1.22,2.81) |
| Cornelis MC, 2022      | MAP (dementia: 888/266 AD:888/252)                | ≥8 cups/day            | 1.09(0.77,1.54) | 1.65(1.03,2.53) |
|                        |                                                   | Caffeine               |                 |                 |
|                        |                                                   | ≤100 mg/day            | Reference       | Reference       |
|                        |                                                   | >100 mg/day            | 1.35(1.03,1.76) | 1.41(1.07,1.85) |
|                        |                                                   | Caffeine (male)        |                 |                 |
|                        |                                                   | ≤100 mg/day            | Reference       | Reference       |
|                        |                                                   | >100 mg/day            | 1.36(0.69,2.69) | 1.56(0.76,3.18) |
|                        |                                                   | Caffeine(female)       |                 |                 |
| ≤100 mg/day            | Reference                                         | Reference              |                 |                 |
| >100 mg/day            | 1.38(1.01,1.88)                                   | 1.41(1.02,1.94)        |                 |                 |
| Zhang Y, 2021          | UK Biobank (dementia: 365682/5069 AD:365682/2128) | Tea:                   |                 |                 |
|                        |                                                   | 0 cup/day              | Reference       | Reference       |
|                        |                                                   | 0.5-1 cup/day          | 0.92(0.82,1.03) | 0.91(0.77,1.09) |
|                        |                                                   | 2-3 cups/day           | 0.92(0.84,1.01) | 0.92(0.80,1.06) |
|                        |                                                   | ≥4 cups/day            | 0.89(0.82,0.98) | 0.89(0.78,1.02) |
|                        |                                                   | Coffee:                |                 |                 |
|                        |                                                   | 0 cup/day              | Reference       | Reference       |
|                        |                                                   | 0.5-1 cup/day          | 0.94(0.87,1.02) | 1.05(0.92,1.19) |
|                        |                                                   | 2-3 cups/day           | 0.93(0.85,0.98) | 1.00(0.88,1.14) |
|                        |                                                   | ≥4 cups/day            | 0.96(0.88,1.06) | 1.14(0.99,1.32) |
| Matsushita N, 2021     | Murakami cohort (dementia: 13757/309)             | Green tea:             |                 |                 |
|                        |                                                   | Q1 (<60) ml/day        | Reference       |                 |
|                        |                                                   | Q2 (≥60, <160) ml/day  | 0.68(0.46,1.03) |                 |
|                        |                                                   | Q3 (≥160, <300) ml/day | 0.99(0.59,1.66) |                 |
|                        |                                                   | Q4 (≥300, <600) ml/day | 0.76(0.53,1.08) |                 |
|                        |                                                   | Q5 (≥600) ml/day       | 0.72(0.51,1.03) |                 |
|                        |                                                   | Green tea (male) :     |                 |                 |
|                        |                                                   | Q1 (<60) ml/day        | Reference       |                 |
|                        |                                                   | Q2 (≥60, <160) ml/day  | 0.53(0.30,0.93) |                 |
|                        |                                                   | Q3 (≥160, <300) ml/day | 0.57(0.26,1.21) |                 |
| Q4 (≥300, <600) ml/day | 0.64(0.40,1.04)                                   |                        |                 |                 |

|         |                |                                 |                 |
|---------|----------------|---------------------------------|-----------------|
|         |                | Q5 ( $\geq 600$ ) ml/day        | 0.72(0.45,1.15) |
|         |                | Green tea (female) :            |                 |
|         |                | Q1 ( $< 60$ ) ml/day            |                 |
|         |                | Q2 ( $\geq 60, < 160$ ) ml/day  | Reference       |
|         |                | Q3 ( $\geq 160, < 300$ ) ml/day | 0.90(0.50,1.62) |
|         |                | Q4 ( $\geq 300, < 600$ ) ml/day | 1.94(0.94,4.00) |
|         |                | Q5 ( $\geq 600$ ) ml/day        | 0.97(0.57,1.66) |
|         |                |                                 | 0.75(0.44,1.27) |
|         |                | Coffee:                         |                 |
|         |                | 0                               | Reference       |
|         |                | 0.1-0.9 cup/day                 | 1.05(0.8,1.38)  |
|         |                | 1-1.9 cups/day                  | 0.69(0.48,0.98) |
|         |                | 2-2.9 cups/day                  | 0.76(0.5,1.14)  |
|         |                | $\geq 3$ cups/day               | 0.53(0.31,0.89) |
|         |                | Coffee(male):                   |                 |
|         |                | 0                               | Reference       |
|         |                | 0.1-0.9 cup/day                 | 0.61(0.37,1)    |
|         |                | 1-1.9 cups/day                  | 0.44(0.22,0.89) |
|         |                | 2-2.9 cups/day                  | 0.44(0.22,0.89) |
|         |                | $\geq 3$ cups/day               | 0.23(0.1,0.54)  |
|         |                | Coffee(female):                 |                 |
|         |                | 0                               | Reference       |
|         |                | 0.1-0.9 cup/day                 | 0.74(0.44,1.24) |
|         |                | 1-1.9 cups/day                  | 1.1(0.65,1.87)  |
|         |                | 2-2.9 cups/day                  | 1.1(0.65,1.87)  |
|         |                | $\geq 3$ cups/day               | 1.16(0.58,2.3)  |
|         |                | Caffeine:                       |                 |
|         |                | Q1 ( $< 92$ ) mg/day            | Reference       |
|         |                | Q2 ( $\geq 92, < 155$ ) mg/day  | 0.89(0.66,1.19) |
|         |                | Q3 ( $\geq 155, < 236$ ) mg/day | 0.65(0.46,0.91) |
|         |                | Q4 ( $\geq 236, < 333$ ) mg/day | 0.55(0.37,0.8)  |
|         |                | Q5 ( $\geq 333$ ) mg/day        | 0.62(0.42,0.91) |
|         |                | Caffeine(male):                 |                 |
|         |                | Q1 ( $< 92$ ) mg/day            | Reference       |
|         |                | Q2 ( $\geq 92, < 155$ ) mg/day  | 0.96(0.64,1.45) |
|         |                | Q3 ( $\geq 155, < 236$ ) mg/day | 0.7(0.45,1.11)  |
|         |                | Q4 ( $\geq 236, < 333$ ) mg/day | 0.48(0.28,0.84) |
|         |                | Q5 ( $\geq 333$ ) mg/day        | 0.45(0.25,0.81) |
|         |                | Caffeine(female):               |                 |
|         |                | Q1 ( $< 92$ ) mg/day            | Reference       |
|         |                | Q2 ( $\geq 92, < 155$ ) mg/day  | 0.8(0.52,1.24)  |
|         |                | Q3 ( $\geq 155, < 236$ ) mg/day | 0.57(0.35,0.95) |
|         |                | Q4 ( $\geq 236, < 333$ ) mg/day | 0.6(0.35,1.03)  |
|         |                | Q5 ( $\geq 333$ ) mg/day        | 0.81(0.47,1.39) |
|         |                | Green tea:                      |                 |
| Fischer | AgeCoDe        | Never vs. Every day             | 0.94(0.86,1.02) |
| K, 2018 | (AD: 2622/418) | Coffee:                         |                 |
|         |                | Never vs. Every day             | 0.97(0.90,1.04) |

|                              |                                                                                               |                  |                 |
|------------------------------|-----------------------------------------------------------------------------------------------|------------------|-----------------|
|                              |                                                                                               | Coffee:          |                 |
|                              |                                                                                               | <1.0 cups/day    | Reference       |
|                              |                                                                                               | 1.0–2.9 cups/day | 0.99(0.85,1.16) |
|                              |                                                                                               | 3.0–4.9 cups/day | 1.03(0.88,1.21) |
|                              |                                                                                               | ≥5.0 cups/day    | 1.07(0.9,1.28)  |
| Larsson<br>SC, 2018          | SIMPLER<br>(AD:<br>28775/3755)                                                                | Coffee (male):   | Reference       |
|                              |                                                                                               | <1.0 cups/day    | 1.07(0.85,1.35) |
|                              |                                                                                               | 1.0–2.9 cups/day | 1.03(0.82,1.31) |
|                              |                                                                                               | 3.0–4.9 cups/day | 1.07(0.83,1.37) |
|                              |                                                                                               | ≥5.0 cups/day    |                 |
|                              |                                                                                               | Coffee (female): | Reference       |
|                              |                                                                                               | <1.0 cups/day    | 0.94(0.76,1.17) |
|                              |                                                                                               | 1.0–2.9 cups/day | 1.03(0.83,1.28) |
|                              |                                                                                               | 3.0–4.9 cups/day | 1.11(0.87,1.41) |
|                              |                                                                                               | ≥5.0 cups/day    |                 |
|                              |                                                                                               | Coffee:          | Reference       |
|                              |                                                                                               | none             | 1.01(0.72,1.41) |
| Park SY,<br>2017             | MEC<br>(AD:<br>185855/1404)                                                                   | 1–3 cups/month   | 0.92(0.69,1.24) |
|                              |                                                                                               | 1–6 cups/week    | 0.90(0.71,1.14) |
|                              |                                                                                               | 1 cup/day        | 1.16(0.90,1.49) |
|                              |                                                                                               | 2–3 cups/day     | 1.33(0.86,2.04) |
|                              |                                                                                               | ≥4 cups/day      |                 |
|                              |                                                                                               | Green Tea:       | Reference       |
|                              |                                                                                               | <1 cup/day       | 1.06(0.89,1.27) |
|                              |                                                                                               | 1–2 cups/day     | 0.88(0.74,1.04) |
|                              |                                                                                               | 3–4 cups/day     | 0.73(0.61,0.87) |
|                              |                                                                                               | ≥5 cups/day      |                 |
|                              |                                                                                               | Black tea:       | Reference       |
|                              |                                                                                               | <1 cup/day       | 0.69(0.46,1.04) |
|                              |                                                                                               | 1–2 cups/day     | 1.03(0.62,1.72) |
|                              |                                                                                               | 3–4 cups/day     | 0.68(0.34,1.35) |
|                              |                                                                                               | ≥5 cups/day      |                 |
|                              |                                                                                               | Oolong tea:      | Reference       |
|                              |                                                                                               | <1 cup/day       | 1.05(0.8,1.39)  |
|                              |                                                                                               | 1–2 cups/day     | 1.13(0.68,1.87) |
|                              |                                                                                               | 3–4 cups/day     | 0.71(0.28,1.79) |
|                              |                                                                                               | ≥5 cups/day      |                 |
|                              |                                                                                               | Coffee:          | Reference       |
|                              |                                                                                               | Never            | 0.73(0.62,0.86) |
|                              |                                                                                               | Occasionally     | 0.72(0.61,0.84) |
|                              |                                                                                               | 1–2 cups/day     | 0.82(0.65,1.02) |
|                              |                                                                                               | ≥3 cups/day      |                 |
|                              |                                                                                               | Caffeine:        | Reference       |
|                              |                                                                                               | <50 mg/day       | 0.96(0.70,1.32) |
|                              |                                                                                               | 50–199 mg/day    | 1.04(0.76,1.43) |
|                              |                                                                                               | 200+ mg/day      |                 |
|                              |                                                                                               | Caffeine:        | Reference       |
|                              |                                                                                               | <50 mg/day       | 0.76(0.52,1.10) |
|                              |                                                                                               | 50–199 mg/day    | 0.66(0.43,0.99) |
|                              |                                                                                               | 200+ mg/day      |                 |
| Tomata<br>Y, 2016            | Ohsaki Cohort<br>(dementia:<br>13645/1186)                                                    |                  |                 |
| Sugiyama<br>K, 2016          | Ohsaki Cohort<br>(dementia:<br>13137/1107)                                                    |                  |                 |
| Paganini-<br>Hill A,<br>2016 | LWCS in 1980s<br>(dementia:<br>587/268)<br>LWCS in 2003 or<br>later<br>(dementia:<br>338/154) |                  |                 |



|                   |                                                                   |                                                                                                                          |                                                                                       |                                                                                       |                                                   |                                                          |                                                 |  |
|-------------------|-------------------------------------------------------------------|--------------------------------------------------------------------------------------------------------------------------|---------------------------------------------------------------------------------------|---------------------------------------------------------------------------------------|---------------------------------------------------|----------------------------------------------------------|-------------------------------------------------|--|
| Driscoll I, 2016  | WHIMS<br>(dementia:<br>6467/388)                                  | Caffeine:<br><175 mg/day<br>≥175 mg/day                                                                                  | Reference<br>0.74(0.56,0.99)                                                          |                                                                                       |                                                   |                                                          |                                                 |  |
| Loftfield E, 2015 | The PLCO<br>Cancer Screening<br>Trial<br>(AD:<br>90317/8718)      | Coffee:<br>0<br>0-1 cup/day<br>1 cup/day<br>2-3 cups/day<br>≥4 cups/day                                                  |                                                                                       | Reference<br>1.01(0.53,1.95)<br>0.66(0.32,1.36)<br>0.59(0.31,1.11)<br>0.72(0.33,1.58) |                                                   |                                                          |                                                 |  |
|                   |                                                                   | Green tea:<br>None<br>1-6 days/week<br>Every day                                                                         | Reference<br>0.90(0.34,2.35)<br>0.26(0.06,1.06)                                       |                                                                                       |                                                   |                                                          |                                                 |  |
|                   |                                                                   | Noguchi-Shinohara M, 2014                                                                                                | Nakajima Project<br>(dementia:<br>2845/490)                                           | Black tea:<br>None<br>1-7 days/week                                                   | Reference<br>2.14(0.75,6.08)                      |                                                          |                                                 |  |
| Mirza SS, 2014    | Rotterdam Study<br>(dementia:<br>5408/814)                        | Coffee:<br>None<br>1-6 days/week<br>Every day                                                                            | Reference<br>1.00(0.34,2.99)<br>0.70(0.22,2.17)                                       |                                                                                       |                                                   |                                                          |                                                 |  |
|                   |                                                                   | Coffee:<br>0-1 cup/day<br>1-3 cups/day<br>3 cups/day                                                                     | Reference<br>0.88(0.67,1.16)<br>1.00(0.76,1.30)                                       |                                                                                       |                                                   |                                                          |                                                 |  |
|                   |                                                                   | Coffee:<br>0 oz/day<br>4-8 oz/day<br>12-16 oz/day<br>20-24 oz/day<br>≥28 oz/day                                          | Reference<br>0.93(0.59,1.46)<br>1.24(0.78,1.97)<br>1.14(0.66,1.98)<br>1.09(0.59,2.00) | Reference<br>0.89(0.5,1.59)<br>1.09(0.60,2.00)<br>0.95(0.45,2.00)<br>0.59(0.23,1.54)  |                                                   |                                                          |                                                 |  |
| Gelber RP, 2011   | HAAS<br>(dementia:<br>3734/226;<br>AD: 3734/118;<br>Vad: 3734/80) | Caffeine:<br>0-115.5 mg/day<br>>115.5-188.0 mg/day<br>>188.0-277.5 mg/day<br>>277.5-415.0 mg/day<br>>415.0-2673.0 mg/day | Reference<br>1.21(0.74,1.96)<br>1.31(0.82,2.09)<br>1.47(0.92,2.35)<br>1.12(0.66,1.91) | Reference<br>1.20(0.65,2.23)<br>1.15(0.62,2.11)<br>1.07(0.57,2.00)<br>0.95(0.46,1.95) |                                                   |                                                          |                                                 |  |
|                   |                                                                   | Tea: drinking 1 cup /day<br>vs. not drinking                                                                             | 1.04(0.59,1.84)                                                                       | 0.91(0.48,1.71)                                                                       |                                                   |                                                          |                                                 |  |
|                   |                                                                   | Eskelinen MH, 2009                                                                                                       | CAIDE<br>(dementia:1409/6<br>1; AD:1409/48)                                           | Coffee:<br>0-2 cups/day<br>3-5 cups/day<br>>5 cups/day                                | Reference<br>0.30(0.10,0.93)<br>0.83(0.32,2.15)   | Reference<br>0.42(0.12,1.46)<br>1.01(0.33,3.08)          |                                                 |  |
|                   |                                                                   |                                                                                                                          |                                                                                       | Laitala VS, 2009                                                                      | Finnish Twin<br>Cohort<br>(dementia:<br>2606/445) | Coffee:<br>0-3 cups/day<br>3.5-8 cups/day<br>>8 cups/day | Reference<br>0.91(0.52,1.58)<br>1.94(0.86,4.38) |  |

|                    |                                          |                                                                                  |                                                 |
|--------------------|------------------------------------------|----------------------------------------------------------------------------------|-------------------------------------------------|
| Dai Q,<br>2006     | Kame Project<br>cohort<br>(AD: 1589/270) | Tea:<br>Less often than weekly<br>1–2 Times per week<br>3 Times or More per week | Reference<br>1.49(0.43,5.16)<br>1.70(0.67,4.33) |
| Lindsay J,<br>2002 | CSHA<br>(AD: 4088/194)                   | Tea<br>Coffee                                                                    | 1.12(0.78,1.61)<br>0.69(0.50,0.96)              |
| Tyas SL,<br>2001   | MSHA<br>(AD: 694/36)                     | Tea<br>Coffee                                                                    | 0.46(0.20,1.06)<br>1.03(0.47,2.30)              |

**Abbreviation:** AD, Alzheimer’s disease; VaD, Vascular Dementia; NA, not available; HUNT, the Trøndelag Health Study of Norway; CSHA, Canadian Study of Health and Aging; MSHA, the Manitoba Study of Health and Aging; MEC, the Multiethnic Cohort study; HAAS, the Honolulu-Asia Aging Stud; HAAS, the Honolulu-Asia Aging Study; CAIDE, the Cardiovascular risk factors; Aging and Dementia study; MAP, the Rush Memory and Aging Project; AgeCoDe: the German Study on Ageing, Cognition and Dementia in Primary Care Patients study; SIMPLER, Swedish Infrastructure for Medical Population-based Life-course Environmental Research; WHIMS, the Women’s Health Initiative Memory Study.

**Table S4. Quality assessment of included cohort studies for the association of tea intake and dementia and Alzheimer's Disease**

| First author (year)       | Study Selection |   |   |   | Comparability of cohorts |   | Outcome |   |   | Total |
|---------------------------|-----------------|---|---|---|--------------------------|---|---------|---|---|-------|
|                           | a               | b | c | d | e                        | f | g       | h | i |       |
| <b>Dementia</b>           |                 |   |   |   |                          |   |         |   |   |       |
| Abbel D, 2023             | 1               | 1 | 0 | 1 | 0                        | 1 | 1       | 1 | 0 | 6     |
| Zhang Y, 2021             | 1               | 1 | 0 | 1 | 1                        | 1 | 1       | 1 | 1 | 8     |
| Matsushita N, 2021        | 1               | 1 | 0 | 1 | 1                        | 1 | 1       | 1 | 0 | 7     |
| Tomata Y, 2016            | 1               | 1 | 0 | 1 | 1                        | 1 | 1       | 1 | 1 | 8     |
| Noguchi-Shinohara M, 2014 | 1               | 1 | 1 | 1 | 1                        | 0 | 1       | 0 | 1 | 7     |
| Eskelinen MH, 2009        | 1               | 1 | 0 | 1 | 1                        | 1 | 1       | 1 | 0 | 7     |
| <b>AD</b>                 |                 |   |   |   |                          |   |         |   |   |       |
| Zhang Y, 2021             | 1               | 1 | 0 | 1 | 1                        | 1 | 1       | 1 | 1 | 8     |
| Fischer K, 2018           | 1               | 1 | 1 | 1 | 1                        | 0 | 1       | 1 | 1 | 8     |
| Eskelinen MH, 2009        | 1               | 1 | 0 | 1 | 1                        | 1 | 1       | 1 | 0 | 7     |
| Dai Q, 2006               | 1               | 1 | 1 | 1 | 1                        | 0 | 1       | 1 | 1 | 8     |
| Lindsay J, 2002           | 1               | 1 | 1 | 1 | 0                        | 0 | 1       | 1 | 1 | 7     |
| Tyas SL, 2001             | 1               | 1 | 1 | 1 | 0                        | 0 | 1       | 1 | 0 | 6     |

- a. Representativeness of the exposed cohort;
- b. Selection of the non-exposed cohort;
- c. Ascertainment of exposure;
- d. Demonstration that outcome of interest was not present at start of study;
- e. Comparability of cohorts on the basis of the design or analysis (adjusted for physical activity);
- f. Comparability of cohorts on the basis of the design or analysis (adjusted for cardiovascular disease);
- g. Assessment of outcome;
- h. Was follow-up long enough for outcomes to occur;
- i. Adequacy of follow-up of cohorts.

**Table S5. Quality assessment of included cohort studies for the association of coffee intake and dementia and Alzheimer's Disease**

| First author (year)       | Study Selection |   |   |   | Comparability of cohorts |   | Outcome |   |   | Total |
|---------------------------|-----------------|---|---|---|--------------------------|---|---------|---|---|-------|
|                           | a               | b | c | d | e                        | f | g       | h | i |       |
| <b>Dementia</b>           |                 |   |   |   |                          |   |         |   |   |       |
| Abbel D, 2023             | 1               | 1 | 0 | 1 | 0                        | 1 | 1       | 1 | 0 | 6     |
| Zhang Y, 2021             | 1               | 1 | 0 | 1 | 1                        | 1 | 1       | 1 | 1 | 8     |
| Matsushita N, 2021        | 1               | 1 | 0 | 1 | 1                        | 1 | 1       | 1 | 0 | 7     |
| Sugiyama K, 2016          | 1               | 1 | 1 | 1 | 1                        | 1 | 1       | 1 | 1 | 9     |
| Noguchi-Shinohara M, 2014 | 1               | 1 | 1 | 1 | 1                        | 0 | 1       | 0 | 1 | 7     |
| Mirza SS, 2014            | 1               | 1 | 1 | 1 | 0                        | 0 | 1       | 1 | 1 | 7     |
| Gelber RP, 2011           | 1               | 1 | 1 | 1 | 1                        | 0 | 1       | 1 | 1 | 8     |
| Eskelinen MH, 2009        | 1               | 1 | 0 | 1 | 1                        | 1 | 1       | 1 | 0 | 7     |
| Laitala VS, 2009          | 0               | 1 | 1 | 1 | 0                        | 1 | 1       | 1 | 1 | 7     |
| <b>AD</b>                 |                 |   |   |   |                          |   |         |   |   |       |
| Abbel D, 2023             | 1               | 1 | 0 | 1 | 0                        | 1 | 1       | 1 | 0 | 6     |
| Zhang Y, 2021             | 1               | 1 | 0 | 1 | 1                        | 1 | 1       | 1 | 1 | 8     |
| Larsson SC, 2018          | 1               | 1 | 1 | 1 | 0                        | 0 | 1       | 1 | 0 | 6     |
| Fischer K, 2018           | 1               | 1 | 1 | 1 | 1                        | 0 | 1       | 1 | 1 | 8     |
| Park SY, 2017             | 1               | 1 | 0 | 1 | 1                        | 1 | 1       | 1 | 1 | 8     |
| Lofffield E, 2015         | 1               | 1 | 1 | 1 | 0                        | 0 | 1       | 1 | 0 | 6     |
| Gelber RP, 2011           | 1               | 1 | 1 | 1 | 1                        | 0 | 1       | 1 | 1 | 8     |
| Eskelinen MH, 2009        | 1               | 1 | 0 | 1 | 1                        | 1 | 1       | 1 | 0 | 7     |
| Lindsay J, 2002           | 1               | 1 | 1 | 1 | 0                        | 0 | 1       | 1 | 1 | 7     |
| Tyas SL, 2001             | 1               | 1 | 1 | 1 | 0                        | 0 | 1       | 1 | 0 | 6     |

- a. Representativeness of the exposed cohort;
- b. Selection of the non-exposed cohort;
- c. Ascertainment of exposure;
- d. Demonstration that outcome of interest was not present at start of study;
- e. Comparability of cohorts on the basis of the design or analysis (adjusted for physical activity);
- f. Comparability of cohorts on the basis of the design or analysis (adjusted for cardiovascular disease);
- g. Assessment of outcome;
- h. Was follow-up long enough for outcomes to occur;
- i. Adequacy of follow-up of cohorts.

**Table S6. Quality assessment of included cohort studies for the association of caffeine intake and dementia and Alzheimer's Disease**

| First author (year)   | Study Selection |   |   |   | Comparability of cohorts |   | Outcome |   |   | Total |
|-----------------------|-----------------|---|---|---|--------------------------|---|---------|---|---|-------|
|                       | a               | b | c | d | e                        | f | g       | h | i |       |
| <b>Dementia</b>       |                 |   |   |   |                          |   |         |   |   |       |
| Cornelis MC, 2022     | 1               | 1 | 0 | 1 | 1                        | 1 | 1       | 1 | 1 | 8     |
| Matsushita N, 2021    | 1               | 1 | 0 | 1 | 1                        | 1 | 1       | 1 | 0 | 7     |
| Paganini-Hill A, 2016 | 0               | 1 | 1 | 1 | 0                        | 0 | 1       | 1 | 1 | 6     |
| Driscoll I, 2016      | 1               | 1 | 1 | 1 | 1                        | 1 | 1       | 1 | 1 | 9     |
| Gelber RP, 2011       | 1               | 1 | 1 | 1 | 1                        | 0 | 1       | 1 | 1 | 8     |
| <b>AD</b>             |                 |   |   |   |                          |   |         |   |   |       |
| Cornelis MC, 2022     | 1               | 1 | 0 | 1 | 1                        | 1 | 1       | 1 | 1 | 8     |
| Gelber RP, 2011       | 1               | 1 | 1 | 1 | 1                        | 0 | 1       | 1 | 1 | 8     |

- a. Representativeness of the exposed cohort;
- b. Selection of the non-exposed cohort;
- c. Ascertainment of exposure;
- d. Demonstration that outcome of interest was not present at start of study;
- e. Comparability of cohorts on the basis of the design or analysis (adjusted for physical activity);
- f. Comparability of cohorts on the basis of the design or analysis (adjusted for cardiovascular disease);
- g. Assessment of outcome;
- h. Was follow-up long enough for outcomes to occur;
- i. Adequacy of follow-up of cohorts.

**Table S7. Subgroup analysis of tea intake and risk of dementia and Alzheimer's Disease for the highest versus lowest meta-analysis.**

| Subgroups                                    | No. of studies | Tea intake <sup>□</sup> |                         |                       | <i>P</i> <sub>2</sub> |
|----------------------------------------------|----------------|-------------------------|-------------------------|-----------------------|-----------------------|
|                                              |                | RR (95% CI)             | <i>I</i> <sup>2</sup> % | <i>P</i> <sub>1</sub> |                       |
| <b>Dementia</b>                              |                |                         |                         |                       |                       |
| <b>Exposure</b>                              |                |                         |                         |                       |                       |
| Tea                                          | 3              | 0.90(0.83,0.98)         | 0%                      | 0.62                  | 0.49                  |
| Green tea                                    | 3              | 0.72(0.61,0.84)         | 0%                      | 0.38                  | 0.19                  |
| Oolong tea                                   | 1              | 0.68(0.34,1.36)         | --                      | --                    | 0.29                  |
| Black tea                                    | 2              | 1.20(0.41,3.53)         | 58%                     | 0.12                  | Ref                   |
| <b>Mean age</b>                              |                |                         |                         |                       |                       |
| <70                                          | 3              | 0.89(0.82,0.97)         | 8%                      | 0.34                  | Ref                   |
| ≥70                                          | 3              | 0.74(0.63,0.88)         | 42%                     | 0.18                  | 0.06                  |
| <b>No of participants</b>                    |                |                         |                         |                       |                       |
| <5000                                        | 2              | 0.61(0.16,2.29)         | 68%                     | 0.08                  | Ref                   |
| ≥5000                                        | 4              | 0.84(0.73,0.96)         | 51%                     | 0.11                  | 0.97                  |
| <b>No of cases</b>                           |                |                         |                         |                       |                       |
| <500                                         | 3              | 0.76(0.56,1.03)         | 41%                     | 0.18                  | Ref                   |
| ≥500                                         | 3              | 0.86(0.73,1.00)         | 61%                     | 0.08                  | 0.53                  |
| <b>Region</b>                                |                |                         |                         |                       |                       |
| Asia                                         | 3              | 0.72(0.61,0.84)         | 0%                      | 0.38                  | Ref                   |
| Europe                                       | 3              | 0.90(0.83,0.98)         | 0%                      | 0.62                  | 0.01*                 |
| <b>Follow-up years</b>                       |                |                         |                         |                       |                       |
| <10                                          | 3              | 0.72(0.61,0.84)         | 0%                      | 0.38                  | Ref                   |
| ≥10                                          | 3              | 0.90(0.83,0.98)         | 0%                      | 0.62                  | 0.01*                 |
| <b>Exposure assessment</b>                   |                |                         |                         |                       |                       |
| Dietary record                               | 1              | 0.72(0.51,1.02)         | --                      | --                    | Ref                   |
| FFQ                                          | 2              | 0.56(0.23,1.35)         | 49%                     | 0.16                  | 0.99                  |
| others                                       | 3              | 0.90(0.83,0.98)         | 0%                      | 0.62                  | 0.22                  |
| <b>Adjustment for PA</b>                     |                |                         |                         |                       |                       |
| No                                           | 2              | 0.84(0.61,1.16)         | 73%                     | 0.05                  | Ref                   |
| Yes                                          | 4              | 0.87(0.79,0.97)         | 32%                     | 0.22                  | 0.98                  |
| <b>Adjustment for CVD</b>                    |                |                         |                         |                       |                       |
| Yes                                          | 5              | 0.85(0.74,0.97)         | 39%                     | 0.16                  | 0.11                  |
| No                                           | 1              | 0.26(0.06,1.09)         | --                      | --                    | Ref                   |
| <b>Adjustment for ApoE E4 carrier status</b> |                |                         |                         |                       |                       |
| No                                           | 3              | 0.89(0.82,0.97)         | 8%                      | 0.34                  | Ref                   |
| Yes                                          | 3              | 0.74(0.63,0.88)         | 42%                     | 0.18                  | 0.06                  |

|                                              |   |                 |     |      |      |
|----------------------------------------------|---|-----------------|-----|------|------|
| <b>AD</b>                                    |   |                 |     |      |      |
| <b>Mean age</b>                              |   |                 |     |      |      |
| <70                                          | 1 | 0.89(0.78,1.02) | --  | --   | Ref  |
| ≥70                                          | 5 | 0.95(0.87,1.03) | 24% | 0.26 | 0.45 |
| <b>No of participants</b>                    |   |                 |     |      |      |
| <5000                                        | 5 | 0.95(0.87,1.03) | 24% | 0.26 | Ref  |
| ≥5000                                        | 1 | 0.89(0.78,1.02) | --  | --   | 0.45 |
| <b>No of cases</b>                           |   |                 |     |      |      |
| <500                                         | 5 | 0.95(0.87,1.03) | 24% | 0.26 | Ref  |
| ≥500                                         | 1 | 0.89(0.78,1.02) | --  | --   | 0.45 |
| <b>Region</b>                                |   |                 |     |      |      |
| Europe                                       | 3 | 0.93(0.86,0.99) | 0%  | 0.80 | Ref  |
| North America                                | 3 | 0.97(0.51,1.85) | 59% | 0.09 | 0.49 |
| <b>Follow-up years</b>                       |   |                 |     |      |      |
| ≥10                                          | 4 | 0.93(0.86,1.00) | 0%  | 0.56 | 0.79 |
| <10                                          | 2 | 0.78(0.33,1.84) | 73% | 0.06 | Ref  |
| <b>Exposure assessment</b>                   |   |                 |     |      |      |
| others                                       | 5 | 0.91(0.81,1.03) | 29% | 0.23 | 0.68 |
| FFQ                                          | 1 | 0.94(0.86,1.02) | --  | --   | Ref  |
| <b>Adjustment for PA</b>                     |   |                 |     |      |      |
| Yes                                          | 4 | 0.93(0.86,1.00) | 0%  | 0.56 | 0.79 |
| No                                           | 2 | 0.78(0.33,1.84) | 73% | 0.06 | Ref  |
| <b>Adjustment for CVD</b>                    |   |                 |     |      |      |
| Yes                                          | 2 | 0.89(0.78,1.02) | 0%  | 0.95 | 0.44 |
| No                                           | 4 | 0.95(0.87,1.03) | 43% | 0.15 | Ref  |
| <b>Adjustment for ApoE E4 carrier status</b> |   |                 |     |      |      |
| No                                           | 3 | 0.90(0.79,1.02) | 49% | 0.14 | Ref  |
| Yes                                          | 3 | 0.94(0.87,1.03) | 0%  | 0.46 | 0.54 |

FFQ, food frequency questionnaire; PA, physical activity; RR, relative risk; CI, confidence interval.

$P_1$ : P value for heterogeneity within each subgroup.

$P_2$ : P value for heterogeneity between subgroups with meta-regression analysis.

**Table S8. Sensitivity analysis of tea intake and dementia and Alzheimer's Disease  
for the highest versus lowest meta-analysis**

| <b>Study omitted</b>      | <b>RR (95% CI)</b> |
|---------------------------|--------------------|
| <b>Dementia</b>           |                    |
| Abbel D, 2023             | 0.81(0.70,0.94)    |
| Zhang Y, 2021             | 0.81(0.67,0.98)    |
| Matsushita N, 2021        | 0.86(0.74,0.99)    |
| Tomata Y, 2016            | 0.89(0.82,0.96)    |
| Noguchi-Shinohara M, 2014 | 0.85(0.74,0.97)    |
| Eskelinen MH, 2009        | 0.83(0.72,0.95)    |
| <b>AD</b>                 |                    |
| Zhang Y, 2021             | 0.95(0.87,1.03)    |
| Fischer K, 2018           | 0.91(0.81,1.03)    |
| Eskelinen MH, 2009        | 0.93(0.87,1.00)    |
| Dai Q, 2006               | 0.93(0.86,0.99)    |
| Lindsay J, 2002           | 0.92(0.86,0.99)    |
| Tyas SL, 2001             | 0.93(0.87,1.00)    |



**Table S9. Subgroup analysis of coffee intake and risk of dementia and Alzheimer's Disease for the highest versus lowest meta-analysis.**

| Subgroups                                    | No. of studies | Coffee intake   |         |       | $P_2$ |
|----------------------------------------------|----------------|-----------------|---------|-------|-------|
|                                              |                | RR (95% CI)     | $I^2$ % | $P_1$ |       |
| <b>Dementia</b>                              |                |                 |         |       |       |
| <b>Outcome</b>                               |                |                 |         |       |       |
| Dementia                                     | 9              | 0.95(0.87,1.02) | 25%     | 0.22  | Ref   |
| VaD                                          | 2              | 1.10(0.46,2.62) | 72%     | 0.06  | 0.13  |
| <b>Mean age</b>                              |                |                 |         |       |       |
| <70                                          | 4              | 0.95(0.87,1.04) | 46%     | 0.14  | Ref   |
| ≥70                                          | 5              | 0.93(0.76,1.13) | 18%     | 0.3   | 0.86  |
| <b>No of participants</b>                    |                |                 |         |       |       |
| <5000                                        | 4              | 1.13(0.75,1.70) | 0%      | 0.43  | Ref   |
| ≥5000                                        | 5              | 0.93(0.86,1.02) | 43%     | 0.13  | 0.37  |
| <b>No of cases</b>                           |                |                 |         |       |       |
| <500                                         | 5              | 0.90(0.56,1.45) | 49%     | 0.10  | Ref   |
| ≥500                                         | 4              | 0.95(0.88,1.03) | 0%      | 0.49  | 0.52  |
| <b>Region</b>                                |                |                 |         |       |       |
| Europe                                       | 5              | 0.98(0.90,1.06) | 0%      | 0.49  | Ref   |
| Asia                                         | 3              | 0.72(0.51,1.00) | 11%     | 0.32  | 0.03* |
| North America                                | 1              | 1.09(0.59,2.01) | --      | --    | 0.28  |
| <b>Follow-up years</b>                       |                |                 |         |       |       |
| ≥10                                          | 6              | 0.98(0.90,1.06) | 0%      | 0.62  | 0.03* |
| <10                                          | 3              | 0.72(0.51,1.00) | 11%     | 0.32  | Ref   |
| <b>Exposure assessment</b>                   |                |                 |         |       |       |
| Dietary record                               | 3              | 0.87(0.55,1.38) | 63%     | 0.07  | Ref   |
| others                                       | 4              | 0.97(0.89,1.06) | 0%      | 0.39  | 0.66  |
| FFQ                                          | 2              | 0.82(0.65,1.02) | 0%      | 0.79  | 0.52  |
| <b>Adjustment for PA</b>                     |                |                 |         |       |       |
| No                                           | 4              | 0.98(0.80,1.19) | 44%     | 0.15  | Ref   |
| Yes                                          | 5              | 0.85(0.64,1.13) | 24%     | 0.26  | 0.43  |
| <b>Adjustment for CVD</b>                    |                |                 |         |       |       |
| Yes                                          | 6              | 0.92(0.79,1.07) | 50%     | 0.08  | 0.61  |
| No                                           | 3              | 1.00(0.78,1.27) | 0%      | 0.80  | Ref   |
| <b>Adjustment for ApoE E4 carrier status</b> |                |                 |         |       |       |
| No                                           | 6              | 0.95(0.87,1.02) | 50%     | 0.07  | Ref   |
| Yes                                          | 3              | 0.95(0.59,1.51) | 0%      | 0.76  | 0.99  |

**AD**

|                                              |   |                 |     |      |       |
|----------------------------------------------|---|-----------------|-----|------|-------|
| <b>Mean age</b>                              |   |                 |     |      |       |
| <70                                          | 5 | 1.12(0.98,1.27) | 0%  | 0.44 | Ref   |
| ≥70                                          | 5 | 0.95(0.82,1.11) | 26% | 0.25 | 0.05  |
| <b>No of participants</b>                    |   |                 |     |      |       |
| <5000                                        | 6 | 0.9(0.75,1.08)  | 2%  | 0.4  | Ref   |
| ≥5000                                        | 4 | 1.11(1.00,1.24) | 0%  | 0.54 | 0.03* |
| <b>No of cases</b>                           |   |                 |     |      |       |
| <500                                         | 5 | 0.87(0.69,1.09) | 20% | 0.29 | Ref   |
| ≥500                                         | 5 | 1.11(1.00,1.23) | 0%  | 0.69 | 0.05  |
| <b>Region</b>                                |   |                 |     |      |       |
| Europe                                       | 5 | 1.04(0.94,1.15) | 8%  | 0.36 | Ref   |
| North America                                | 5 | 0.87(0.61,1.22) | 40% | 0.15 | 0.16  |
| <b>Follow-up years</b>                       |   |                 |     |      |       |
| ≥10                                          | 8 | 1.04(0.94,1.14) | 11% | 0.35 | 0.04* |
| <10                                          | 2 | 0.73(0.54,0.99) | 0%  | 0.36 | Ref   |
| <b>Exposure assessment</b>                   |   |                 |     |      |       |
| Dietary record                               | 2 | 0.91(0.58,1.43) | 5%  | 0.31 | Ref   |
| others                                       | 4 | 0.94(0.67,1.31) | 61% | 0.05 | 0.82  |
| FFQ                                          | 4 | 1.00(0.91,1.09) | 14% | 0.32 | 0.61  |
| <b>Adjustment for PA</b>                     |   |                 |     |      |       |
| No                                           | 5 | 0.91(0.72,1.16) | 34% | 0.20 | Ref   |
| Yes                                          | 5 | 1.05(0.91,1.21) | 40% | 0.15 | 0.34  |
| <b>Adjustment for CVD</b>                    |   |                 |     |      |       |
| Yes                                          | 3 | 1.13(0.98,1.29) | 0%  | 0.91 | 0.05  |
| No                                           | 7 | 0.96(0.82,1.11) | 34% | 0.17 | Ref   |
| <b>Adjustment for ApoE E4 carrier status</b> |   |                 |     |      |       |
| Yes                                          | 3 | 1.13(0.98,1.29) | 0%  | 0.91 | 0.05  |
| No                                           | 7 | 0.96(0.82,1.11) | 34% | 0.17 | Ref   |

VaD, Vascular Dementia; FFQ, food frequency questionnaire; PA, physical activity; RR, relative risk; CI, confidence interval.

$P_1$ : P value for heterogeneity within each subgroup.

$P_2$ : P value for heterogeneity between subgroups with meta-regression analysis.

**Table S10. Sensitivity analysis of coffee intake and dementia and Alzheimer's****Disease for the highest versus lowest meta-analysis**

| <b>Study omitted</b>      | <b>RR (95% CI)</b> |
|---------------------------|--------------------|
| <b>Dementia</b>           |                    |
| Abbel D, 2023             | 0.93(0.85,1.02)    |
| Zhang Y, 2021             | 0.92(0.77,1.10)    |
| Matsushita N, 2021        | 0.96(0.89,1.04)    |
| Sugiyama K, 2016          | 0.96(0.89,1.05)    |
| Noguchi-Shinohara M, 2014 | 0.95(0.88,1.02)    |
| Mirza SS, 2014            | 0.93(0.82,1.04)    |
| Gelber RP, 2011           | 0.94(0.87,1.02)    |
| Eskelinen MH, 2009        | 0.95(0.88,1.02)    |
| Laitala VS, 2009          | 0.94(0.87,1.01)    |
| <b>AD</b>                 |                    |
| Abbel D, 2023             | 1.00(0.88,1.13)    |
| Zhang Y, 2021             | 0.97(0.91,1.04)    |
| Larsson SC, 2018          | 0.98(0.84,1.14)    |
| Fischer K, 2018           | 1.00(0.85,1.19)    |
| Park SY, 2017             | 0.99(0.87,1.11)    |
| Lofffield E, 2015         | 1.01(0.90,1.13)    |
| Gelber RP, 2011           | 1.01(0.91,1.13)    |
| Eskelinen MH, 2009        | 1.00(0.90,1.13)    |
| Lindsay J, 2002           | 1.04(0.94,1.14)    |
| Tyas SL, 2001             | 1.00(0.89,1.13)    |

**Table S11. Subgroup analysis of caffeine intake and risk of dementia for the highest versus lowest meta-analysis.**

| Subgroups                                    | No. of studies | Caffeine intake  |         |       | $P_2$   |
|----------------------------------------------|----------------|------------------|---------|-------|---------|
|                                              |                | RR (95% CI)      | $I^2$ % | $P_1$ |         |
| <b>Dementia</b>                              |                |                  |         |       |         |
| <b>Gender</b>                                |                |                  |         |       |         |
| Female                                       | 3              | 0.95(0.63, 1.44) | 77%     | 0.01  | 0.64    |
| Male                                         | 2              | 0.77(0.26, 2.28) | 83%     | 0.02  | Ref     |
| <b>Mean age</b>                              |                |                  |         |       |         |
| <70                                          | 2              | 0.81(0.45,1.44)  | 68%     | 0.08  | Ref     |
| $\geq 70$                                    | 3              | 1.01(0.72,1.44)  | 78 %    | 0.01  | 0.47    |
| <b>No of participants</b>                    |                |                  |         |       |         |
| <5000                                        | 3              | 1.20(0.98,1.46)  | 0%      | 0.45  | Ref     |
| $\geq 5000$                                  | 2              | 0.70(0.55,0.87)  | 0%      | 0.47  | < 0.01* |
| <b>Region</b>                                |                |                  |         |       |         |
| North America                                | 4              | 1.03(0.78,1.37)  | 67%     | 0.03* | 0.13    |
| Asia                                         | 1              | 0.62(0.42,0.91)  | --      | --    | Ref     |
| <b>Follow-up years</b>                       |                |                  |         |       |         |
| $\geq 10$                                    | 3              | 0.91(0.70,1.20)  | 39%     | 0.2   | 0.98    |
| <10                                          | 2              | 0.93(0.43,1.99)  | 91%     | <0.01 | Ref     |
| <b>Exposure assessment</b>                   |                |                  |         |       |         |
| FFQ                                          | 2              | 1.00(0.56,1.81)  | 89%     | <0.01 | 0.62    |
| Dietary record                               | 2              | 0.81(0.45,1.44)  | 68%     | 0.08  | Ref     |
| others                                       | 1              | 1.04(0.76,1.43)  | --      | --    | 0.63    |
| <b>Adjustment for PA</b>                     |                |                  |         |       |         |
| No                                           | 2              | 0.87(0.62,1.22)  | 59%     | 0.12  | Ref     |
| Yes                                          | 3              | 0.99(0.61,1.60)  | 81%     | <0.01 | 0.71    |
| <b>Adjustment for CVD</b>                    |                |                  |         |       |         |
| Yes                                          | 3              | 0.86(0.54,1.37)  | 86%     | <0.01 | 0.52    |
| No                                           | 2              | 1.06(0.81,1.39)  | 0%      | 0.81  | Ref     |
| <b>Adjustment for ApoE E4 carrier status</b> |                |                  |         |       |         |
| Yes                                          | 2              | 1.30(1.02,1.65)  | 0       | 0.54  | 0.02    |
| No                                           | 3              | 0.79(0.59,1.05)  | 56.60%  | 0.10  | Ref     |

FFQ, food frequency questionnaire; PA, physical activity; RR, relative risk; CI, confidence interval.

$P_1$ : P value for heterogeneity within each subgroup.

$P_2$ : P value for heterogeneity between subgroups with meta-regression analysis.

**Table S12. Sensitivity analysis of caffeine intake and dementia for the highest versus lowest meta-analysis**

| <b>Study omitted</b>  | <b>RR (95% CI)</b> |
|-----------------------|--------------------|
| <b>Dementia</b>       |                    |
| Cornelis MC, 2022     | 0.84(0.65,1.08)    |
| Matsushita N, 2021    | 1.03(0.78,1.37)    |
| Paganini-Hill A, 2016 | 0.91(0.63,1.32)    |
| Driscoll I, 2016      | 1.00(0.72,1.40)    |
| Gelber RP, 2011       | 0.91(0.65,1.27)    |

**Table S13. GRADE evidence profile for observational studies of tea, coffee, and caffeine between dementia and Alzheimer's Disease.**

| Exposure | Outcome  | N <sub>o</sub> of studies | Study design          | Risk of bias | Inconsistency | Indirectness | Imprecision          | Other considerations                | Relative risk (95% CI) | Certainty        |
|----------|----------|---------------------------|-----------------------|--------------|---------------|--------------|----------------------|-------------------------------------|------------------------|------------------|
| Tea      | Dementia | 6                         | Observational studies | Not serious  | Not serious   | Not serious  | Serious <sup>a</sup> | Dose-response gradient <sup>g</sup> | 0.84(0.74,0.96)        | ⊕⊕○○<br>LOW      |
| Tea      | AD       | 6                         | Observational studies | Not serious  | Not serious   | Not serious  | Serious <sup>b</sup> | Dose-response gradient <sup>h</sup> | 0.93(0.87,1.00)        | ⊕⊕○○<br>LOW      |
| Coffee   | Dementia | 9                         | Observational studies | Not serious  | Not serious   | Not serious  | Serious <sup>c</sup> | Dose-response gradient <sup>i</sup> | 0.95(0.87,1.02)        | ⊕⊕○○<br>LOW      |
| Coffee   | AD       | 10                        | Observational studies | Not serious  | Not serious   | Not serious  | Serious <sup>d</sup> | Dose-response gradient <sup>j</sup> | 1.01(0.90,1.12)        | ⊕⊕○○<br>LOW      |
| Caffeine | Dementia | 5                         | Observational studies | Not serious  | Not serious   | Not serious  | Serious <sup>e</sup> | Dose-response gradient <sup>k</sup> | 0.94(0.70,1.25)        | ⊕⊕○○<br>LOW      |
| Caffeine | AD       | 2                         | Observational studies | Not serious  | Not serious   | Not serious  | Serious <sup>f</sup> | None                                | 1.34(1.04,1.74)        | ⊕○○○<br>Very low |

<sup>a</sup> Serious imprecision for tea intake and dementia, as the 95%CI (0.74-0.96) overlapped with the minimally important difference for clinical benefit (RR 0.95).

<sup>b</sup> Serious imprecision for tea intake and AD, as the 95%CI (0.87-1.00) overlapped with the minimally important difference for clinical benefit (RR 0.95).

<sup>c</sup> Serious imprecision for coffee intake and dementia, as the 95%CI (0.87-1.02) overlapped with the minimally important difference for clinical benefit (RR 0.95).

<sup>d</sup> Serious imprecision for coffee intake and AD, as the 95%CI (0.90-1.12) overlapped with the minimally important difference for clinical harm (RR 1.05).

<sup>e</sup> Serious imprecision for caffeine intake and dementia, as the 95%CI (0.70-1.25) overlapped with the minimally important difference for clinical benefit (RR 0.95).

<sup>f</sup> Serious imprecision for caffeine intake and AD, as the 95%CI (1.04-1.74) overlapped with the minimally important difference for clinical harm (RR 1.05).

<sup>g</sup> Upgrade for a dose-response gradient, as the MKSPLINE dose-response analyses showed a significant nonlinear inverse relationship between tea consumption and dementia (P = 0.006 < 0.01).

<sup>h</sup> Upgrade for a dose-response gradient, as the MKSPLINE dose-response analyses showed a linear inverse relationship between tea consumption and AD (P = 0.31 > 0.05).

<sup>i</sup> Upgrade for a dose-response gradient, as the MKSPLINE dose-response analyses showed a nonlinear inverse relationship between coffee consumption and dementia (P = 0.042 < 0.05).

j Upgrade for a dose-response gradient, as the MKSPLINE dose-response analyses showed a linear inverse relationship between coffee consumption and AD ( $P = 0.17 > 0.05$ ).

k Upgrade for a dose-response gradient, as the MKSPLINE dose-response analyses showed a linear inverse relationship between caffeine consumption and dementia ( $P = 0.86 > 0.05$ ).

## **Supplemental Figures**



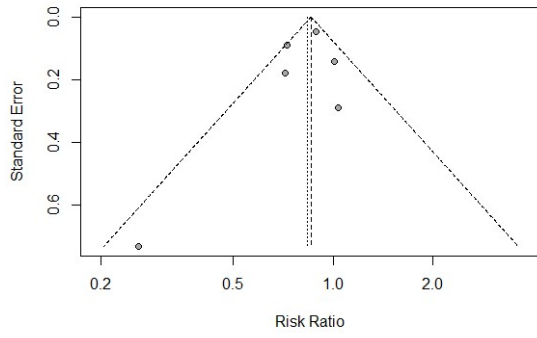

(A)

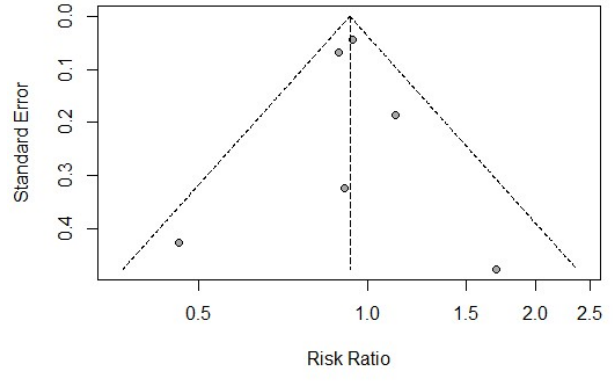

(B)

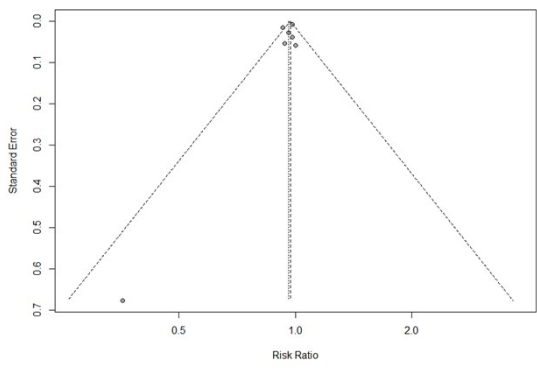

(C)

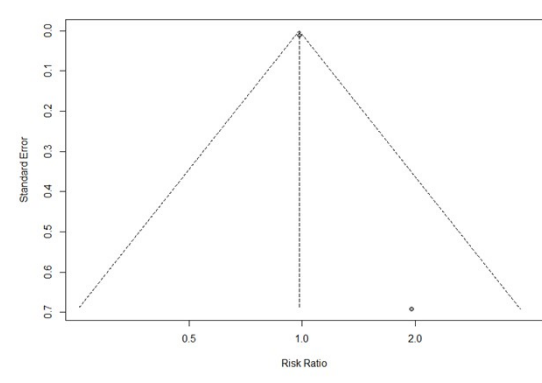

(D)

**Fig. S1 Funnel plots for detection of publication bias of included studies for highest vs. lowest intake meta-analysis of tea intake and risk of dementia(A)and Alzheimer's Disease (B); and for per 1 cup increase intake and risk of dementia(C)and Alzheimer's Disease (D).**

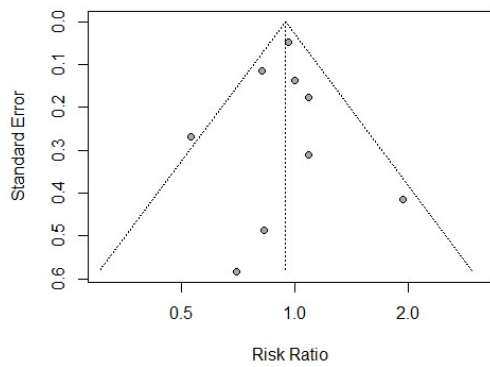

(A)

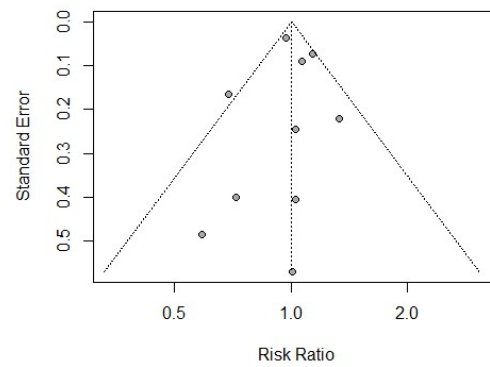

(B)

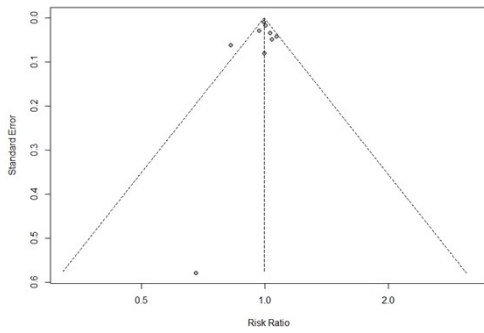

(C)

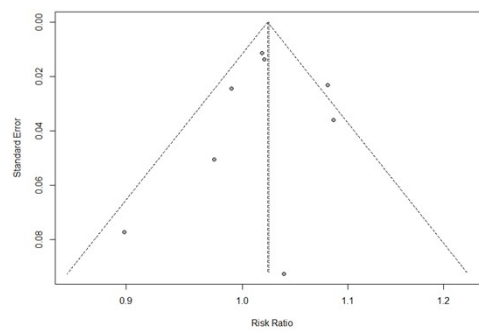

(D)

**Fig. S2 Funnel plots for detection of publication bias of included studies for highest vs. lowest intake meta-analysis of coffee intake and risk of dementia(A) and Alzheimer's Disease (B); and for per 1 cup increase intake and risk of dementia(C)and Alzheimer's Disease (D).**

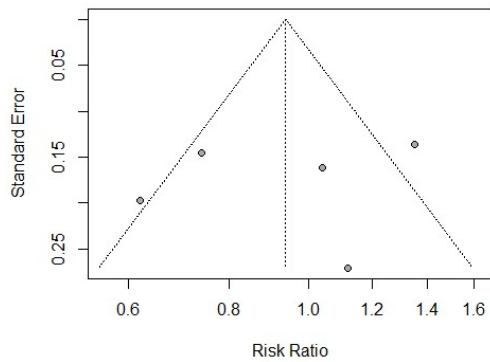

(A)

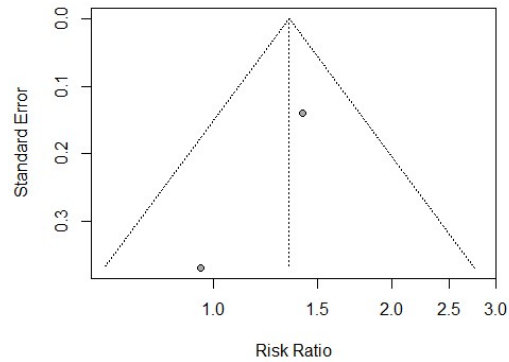

(B)

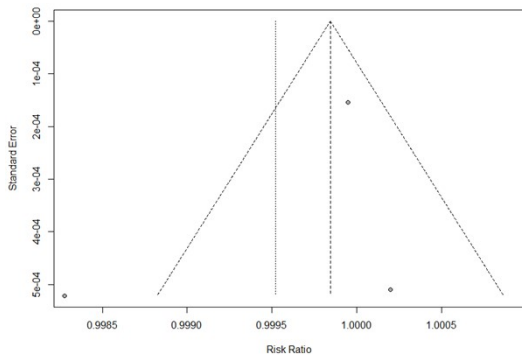

(C)

**Fig. S3 Funnel plots for detection of publication bias of included studies for highest vs. lowest intake meta-analysis of caffeine intake and risk of dementia (A) and Alzheimer's Disease (B); and for per 50 mg increase intake and risk of dementia (C).**

## Reference list

1. Y. Sun, Z. Liang, X. Xia, M. H. Wang, C. Zhu, Y. Pan and R. Sun, Extra cup of tea intake associated with increased risk of Alzheimer's disease: Genetic insights from Mendelian randomization, *Frontiers in nutrition*, 2023, 10, 1052281.
2. L. Huang, Y. Tao, H. Chen, X. Chen, J. Shen, C. Zhao, X. Xu, M. He, D. Zhu, R. Zhang, M. Yang, Y. Zheng and C. Yuan, Mediterranean-Dietary Approaches to Stop Hypertension Intervention for Neurodegenerative Delay (MIND) Diet and Cognitive Function and its Decline: A Prospective Study and Meta-analysis of Cohort Studies, *The American journal of clinical nutrition*, 2023, 118, 174-182.
3. X. P. Cao, W. Xu, Z. T. Wang, L. Tan and J. T. Yu, Dietary Components and Nutritional Strategies for Dementia Prevention in the Elderly, *Current Alzheimer research*, 2023, DOI: 10.2174/1567205020666230609155932.
4. M. Y. YM, H. J. Waldvogel, R. L. M. Faull and A. Kwakowsky, Neuroprotective Effect of Caffeine in Alzheimer's Disease, *Molecules (Basel, Switzerland)*, 2022, 27.
5. M. Shi, L. Cao, H. Liu, Y. Zhou, Y. Zhao and Y. Xia, Association Between Tea Drinking and Cognitive Disorders in Older Adults: A Meta-Analysis of Observational Studies, *Frontiers in aging neuroscience*, 2022, 14.
6. W. Quan, Y. Lin, H. Zou, M. Li, J. Luo, Z. He, J. Chen and Z. Liu, Can habitual tea drinking be an effective approach against age-related neurodegenerative cognitive disorders: A systematic review and meta-analysis of epidemiological evidence, *Critical reviews in food science and nutrition*, 2022, DOI: 10.1080/10408398.2022.2158780, 1-17.
7. M. Pohanka, Role of Caffeine in the Age-related Neurodegenerative Diseases: A Review, *Mini reviews in medicinal chemistry*, 2022, 22, 2726-2735.
8. A. T. Nordestgaard, B. G. Nordestgaard, R. Frikke-Schmidt, I. Juul Rasmussen and S. E. Bojesen, Self-reported and genetically predicted coffee consumption and smoking in dementia: A Mendelian randomization study, *Atherosclerosis*, 2022, 348, 36-43.
9. Y. M. M Yelanchezian, H. J. Waldvogel, R. L. M. Faull and A. Kwakowsky, Neuroprotective Effect of Caffeine in Alzheimer's Disease, *Molecules (Basel, Switzerland)*, 2022, 27, <https://www.ncbi.nlm.nih.gov/pmc/articles/PMC9227174/>.
10. C. Y. Li, J. Y. Lin, T. M. Yang and H. F. Shang, Green Tea Intake and Parkinson's Disease Progression: A Mendelian Randomization Study, *Frontiers in nutrition*, 2022, 9.
11. S. C. Larsson, B. Woolf and D. Gill, Plasma Caffeine Levels and Risk of Alzheimer's Disease and Parkinson's Disease: Mendelian Randomization Study, *Nutrients*, 2022, 14.
12. E. Kim, N. M. Robinson and B. M. Newman, A Brewed Awakening: Neuropsychiatric Effects of Caffeine in Older Adults, *Clinics in geriatric medicine*, 2022, 38, 133-144.
13. Y. Huang, Y. Wei, J. Xu and X. Wei, A comprehensive review on the prevention and regulation of Alzheimer's disease by tea and its active ingredients, *Critical reviews in food science and nutrition*, 2022, DOI: 10.1080/10408398.2022.2081128, 1-25.
14. X. Zhou and L. Zhang, The Neuroprotective Effects of Moderate and Regular Caffeine Consumption in Alzheimer's Disease, *Oxidative medicine and cellular longevity*, 2021, 2021, 5568011.
15. P. Londzin, M. Zamora, B. Kakol, A. Taborek and J. Folwarczna, Potential of Caffeine in Alzheimer's Disease-A Review of Experimental Studies, *Nutrients*, 2021, 13.
16. L. S. Ran, W. H. Liu, Y. Y. Fang, S. B. Xu, J. Li, X. Luo, D. J. Pan, M. H. Wang and W. Wang, Alcohol, coffee and tea intake and the risk of cognitive deficits: A dose-response meta-analysis, *Epidemiology and*

psychiatric sciences, 2020, DOI: 10.1017/S2045796020001183.

17. H. J. Jee, S. G. Lee, K. J. Bormate and Y. S. Jung, Effect of caffeine consumption on the risk for neurological and psychiatric disorders: Sex differences in human, *Nutrients*, 2020, 12, 1-20.
18. J. Q. A. Chen, P. Scheltens, C. Groot and R. Ossenkoppele, Associations Between Caffeine Consumption, Cognitive Decline, and Dementia: A Systematic Review, *Journal of Alzheimer's disease : JAD*, 2020, 78, 1519-1546.
19. J. M. Bae, History of Coffee Consumption and Risk of Alzheimer's Disease: a Meta-epidemiological Study of Population-based Cohort Studies, *Dementia and neurocognitive disorders*, 2020, 19, 108-113.
20. A. Alhowail and M. Aldubayan, Mechanisms underlying cognitive impairment induced by prenatal caffeine exposure, *European review for medical and pharmacological sciences*, 2020, 24, 11909-11913.
21. M. A. Kromhout, N. Rius Ottenheim, E. Giltay, M. E. Numans and W. P. Achterberg, Caffeine and neuropsychiatric symptoms in patients with dementia: A systematic review, *Experimental gerontology*, 2019, 122, 85-91.
22. S. Kakutani, H. Watanabe and N. Murayama, Green Tea Intake and Risks for Dementia, Alzheimer's Disease, Mild Cognitive Impairment, and Cognitive Impairment: A Systematic Review, *Nutrients*, 2019, 11.
23. L. J. Dominguez and M. Barbagallo, Dietary Strategies and Supplements for the Prevention of Cognitive Decline and Alzheimer's Disease, 2019.
24. A. Barczak, Role of drinking coffee in the prevention of dementia, *Aktualnosci Neurologiczne*, 2019, 19, 97-102.
25. S. C. Larsson and N. Orsini, Coffee Consumption and Risk of Dementia and Alzheimer's Disease: A Dose-Response Meta-Analysis of Prospective Studies, *Nutrients*, 2018, 10.
26. L. Wu, D. Sun and Y. He, Coffee intake and the incident risk of cognitive disorders: A dose-response meta-analysis of nine prospective cohort studies, *Clinical nutrition (Edinburgh, Scotland)*, 2017, 36, 730-736.
27. R. Wierzejska. Can coffee consumption lower the risk of Alzheimer's disease and Parkinson's disease? A literature review, *Archives of medical science: AMS*, 2017, 13, 507-514.
28. X. Liu, X. Du, G. Han and W. Gao, Association between tea consumption and risk of cognitive disorders: A dose-response meta-analysis of observational studies, *Oncotarget*, 2017, 8, 43306-43321.
29. W. Fernando, G. Somaratne, K. G. Goozee, S. Williams, H. Singh and R. N. Martins, Diabetes and Alzheimer's Disease: Can Tea Phytochemicals Play a Role in Prevention? *Journal of Alzheimer's disease : JAD*, 2017, 59, 481-501.
30. M. Qing-Ping, H. Chen, C. Qiao-Yun, Y. Ding-Jun, S. Kang, C. Xuan and L. Xing-Hui, Meta-analysis of the association between tea intake and the risk of cognitive disorders, *PloS one*, 2016, 11.
31. Q. P. Ma, C. Huang, Q. Y. Cui, D. J. Yang, K. Sun, X. Chen and X. H. Li, Meta-Analysis of the Association between Tea Intake and the Risk of Cognitive Disorders, *PloS one*, 2016, 11, e0165861.
32. M. K. Kwok, G. M. Leung and C. M. Schooling, Habitual coffee consumption and risk of type 2 diabetes, ischemic heart disease, depression and Alzheimer's disease: a Mendelian randomization study, *Scientific reports*, 2016, 6, 36500.
33. W. Xu, L. Tan, H. F. Wang, T. Jiang, M. S. Tan, L. Tan, Q. F. Zhao, J. Q. Li, J. Wang and J. T. Yu, Meta-analysis of modifiable risk factors for Alzheimer's disease, *Journal of neurology, neurosurgery, and psychiatry*, 2015, 86, 1299-1306.
34. F. Panza, V. Solfrizzi, M. R. Barulli, C. Bonfiglio, V. Guerra, A. Osella, D. Seripa, C. Sabbà, A. Pilotto and G. Logroscino, Coffee, tea, and caffeine consumption and prevention of late-life cognitive decline and dementia: a systematic review, *The journal of nutrition, health & aging*, 2015, 19, 313-328.
35. S. B. Kumar, Role of caffeine in dementia, Alzheimer's, Parkinsonism, Bipolar mood disorder, *Research*

Journal of Pharmacy and Technology, 2015, 8, 1582-1587.

36. Y. S. Kim, S. M. Kwak and S. K. Myung, Caffeine intake from coffee or tea and cognitive disorders: a meta-analysis of observational studies, *Neuroepidemiology*, 2015, 44, 51-63.
37. K. Ide and H. Yamada, Clinical benefits of green tea consumption for cognitive dysfunction, *PharmaNutrition*, 2015, 3, 136-145.
38. L. Feng, M. S. Chong, W. S. Lim, T. S. Lee, E. H. Kua and T. P. Ng, Tea for Alzheimer Prevention, *The journal of prevention of Alzheimer's disease*, 2015, 2, 136-141.
39. M. Varghese, L. Ho, J. Wang, W. Zhao, S. Levine, K. Ono, S. Mannino and G. M. Pasinetti, Green coffee as a novel agent for Alzheimer's disease prevention by attenuating diabetes, *Translational neuroscience*, 2014, 5, 111-116.
40. I. Skoog, Is it dangerous or beneficial to drink coffee? Reflections on a meta-analysis on risk at birth and a population study on risk in late life, *European journal of epidemiology*, 2014, 29, 665-666.
41. V. Flaten, C. Laurent, J. E. Coelho, U. Sandau, V. L. Batalha, S. Burnouf, M. Hamdane, S. Humez, D. Boison, L. V. Lopes, L. Buée and D. Blum, From epidemiology to pathophysiology: what about caffeine in Alzheimer's disease?, *Biochemical Society transactions*, 2014, 42, 587-592.
42. L. Y. Di Marco, A. Marzo, M. Muñoz-Ruiz, M. A. Ikram, M. Kivipelto, D. Ruefenacht, A. Venneri, H. Soininen, I. Wanke, Y. A. Ventikos and A. F. Frangi, Modifiable lifestyle factors in dementia: a systematic review of longitudinal observational cohort studies, *Journal of Alzheimer's disease : JAD*, 2014, 42, 119-135.
43. A. J. Carman, P. A. Dacks, R. F. Lane, D. W. Shineman and H. M. Fillit, Current evidence for the use of coffee and caffeine to prevent age-related cognitive decline and Alzheimer's disease, *The journal of nutrition, health & aging*, 2014, 18, 383-392.
44. M. A. Beydoun, H. A. Beydoun, A. A. Gamaldo, A. Teel, A. B. Zonderman and Y. Wang, Epidemiologic studies of modifiable factors associated with cognition and dementia: systematic review and meta-analysis, *BMC public health*, 2014, 14, 643.
45. J. H. Bae, J. H. Park, S. S. Im and D. K. Song, Coffee and health, *Integrative Medicine Research*, 2014, 3, 189-191.
46. R. Savica, B. R. Grossardt, J. H. Bower, J. E. Ahlskog and W. A. Rocca, Risk factors for Parkinson's disease may differ in men and women: An exploratory study, *Hormones and Behavior*, 2013, 63, 308-314.
47. T. P. Ng, Nutrition and dementia, *International psychogeriatrics*, 2013, 25, S23.
48. A. Nehlig, The neuroprotective effects of cocoa flavanol and its influence on cognitive performance, *British journal of clinical pharmacology*, 2013, 75, 716-727.
49. T. Jiang, J. T. Yu, Y. Tian and L. Tan, Epidemiology and etiology of Alzheimer's disease: from genetic to non-genetic factors, *Current Alzheimer research*, 2013, 10, 852-867.
50. N. Hu, J. T. Yu, L. Tan, Y. L. Wang, L. Sun and L. Tan, Nutrition and the risk of Alzheimer's disease, *BioMed research international*, 2013, 2013, 524820.
51. Y. S. Ho, C. H. L. Hung and R. C. C. Chang, Green Tea and Neurodegeneration in Alzheimer's Disease, 2013.
52. G. E. Crichton, J. Bryan and K. J. Murphy, Dietary antioxidants, cognitive function and dementia--a systematic review, *Plant foods for human nutrition (Dordrecht, Netherlands)*, 2013, 68, 279-292.
53. L. Arab, F. Khan and H. Lam, Epidemiologic evidence of a relationship between tea, coffee, or caffeine consumption and cognitive decline, *Advances in nutrition (Bethesda, Md.)*, 2013, 4, 115-122.
54. J. Song, H. Xu, F. Liu and L. Feng, Tea and cognitive health in late life: current evidence and future directions, *The journal of nutrition, health & aging*, 2012, 16, 31-34.
55. A. Nehlig, Physiological effects of coffee and human health. A review, *Cahiers Agricultures*, 2012, 21,

197-207.

56. J. Campdelacreu, Parkinson disease and Alzheimer disease: environmental risk factors, *Neurologia* (Barcelona, Spain), 2012, DOI: 10.1016/j.nrl.2012.04.001.
57. J. K. Sahni, L. Letenneur, L. H. Dao and C. Ramassamy, in *Lifetime Nutritional Influences on Cognition, Behaviour and Psychiatric Illness*, ed. D. Benton, 2011, pp. 392-419.
58. H. Patil, C. J. Lavie and J. H. O'Keefe, Cuppa joe: friend or foe? Effects of chronic coffee consumption on cardiovascular and brain health, *Missouri medicine*, 2011, 108, 431-438.
59. L. Feng, H. L. Chiu, M. Y. Chong, X. Yu and E. H. Kua, Dementia in Chinese populations: Current data and future research, *Asia-Pacific Psychiatry*, 2011, 3, 109-114.
60. L. Dye, D. Lamport, J. Wightman and C. Lawton, A review of human studies investigating the relationship between polyphenol consumption and cognitive health, *Annals of Nutrition and Metabolism*, 2011, 58, 9-10.
61. P. Barberger-Gateau, C. Feart and C. Samieri, Dietary factors and dementia, *Alzheimer's and Dementia*, 2011, 7, S88.
62. C. Santos, J. Costa, J. Santos, A. Vaz-Carneiro and N. Lunet, Caffeine intake and dementia: systematic review and meta-analysis, *Journal of Alzheimer's disease: JAD*, 2010, 20 Suppl 1, S187-204.
63. A. Nehlig, Is caffeine a cognitive enhancer? *Journal of Alzheimer's disease : JAD*, 2010, 20 Suppl 1, S85-94.
64. M. H. Eskelinen and M. Kivipelto, Caffeine as a protective factor in dementia and Alzheimer's disease, *Journal of Alzheimer's disease: JAD*, 2010, 20 Suppl 1, S167-174.
65. S. M. Chacko, P. T. Thambi, R. Kuttan and I. Nishigaki, Beneficial effects of green tea: A literature review, *Chinese Medicine*, 2010, 5.
66. G. J. Biessels, Caffeine, diabetes, cognition, and dementia, *Journal of Alzheimer's disease: JAD*, 2010, 20 Suppl 1, S143-150.
67. A. Rosso, J. Mossey and C. F. Lippa, Caffeine: neuroprotective functions in cognition and Alzheimer's disease, *American journal of Alzheimer's disease and other dementias*, 2008, 23, 417-422.
68. J. L. B. Quintana, M. F. Allam, A. S. Del Castillo and R. F. C. Navajas, Alzheimer's disease and coffee: a quantitative review, *Neurological research*, 2007, 29, 91-95.
69. A. Collie and G. Morley, Do polyphenols affect human cognitive function?, *Current Topics in Nutraceutical Research*, 2007, 5, 145-148.
70. J. L. Barranco Quintana, M. F. Allam, A. Serrano Del Castillo and R. Fernández-Crehuet Navajas, Alzheimer's disease and coffee: a quantitative review, *Neurological research*, 2007, 29, 91-95.
71. K. Widhalm and D. Fussenegger, Green tea consumption in the prevention of senile dementia, *Journal für Ernährungsmedizin*, 2006, 8, 45.
72. J. Steiner, N. Haughey, W. X. Li, A. Venkatesan, C. Anderson, R. Reid, T. Malpica, C. Pocernich, D. A. Butterfield and A. Nath, Oxidative stress and therapeutic approaches in HIV dementia, *Antioxidants & redox signaling*, 2006, 8, 2089-2100.
73. C. Williamson, Tea drinking prevents memory loss? *Nutrition Bulletin*, 2005, 30, 2-5.
74. B. Frank and S. Gupta, A review of antioxidants and Alzheimer's disease, *Annals of clinical psychiatry : official journal of the American Academy of Clinical Psychiatrists*, 2005, 17, 269-286.
75. O. Weinreb, S. Mandel, T. Amit and M. B. Youdim, Neurological mechanisms of green tea polyphenols in Alzheimer's and Parkinson's diseases, *The Journal of nutritional biochemistry*, 2004, 15, 506-516.
76. R. Whalen, Caffeine anaphylaxis: A progressive toxic dementia, *Journal of Orthomolecular Medicine*, 2003, 18, 25-28.

77. M. A. Crocq, Alcohol, nicotine, caffeine, and mental disorders, *Dialogues in Clinical Neuroscience*, 2003, 5, 175-185.
78. J. S. Kerr and I. Hindmarch, The effects of alcohol alone or in combination with other drugs on information processing, task performance and subjective responses, *Human psychopharmacology*, 1998, 13, 1-9.
79. W. J. Riedel and J. Jolles, Age-related cognitive decline. Possibilities and impossibilities of pharmacological treatment, *Pharmaceutisch Weekblad*, 1997, 132, 1098-1107.
80. W. J. Riedel and J. Jolles, Cognition enhancers in age-related cognitive decline, *Drugs & aging*, 1996, 8, 245-274.
81. T. P. Flaten and M. Odegård, Tea, aluminium and Alzheimer's disease, *Food and chemical toxicology: an international journal published for the British Industrial Biological Research Association*, 1988, 26, 959-960.
82. N. Jiang, J. Ma, Q. Wang, Y. Xu and B. Wei, Tea intake or consumption and the risk of dementia: a meta-analysis of prospective cohort studies, *PeerJ*, 2023, 11.
83. I. S. Nila, V. M. Villagra Moran, Z. A. Khan and Y. Hong, Effect of Daily Coffee Consumption on the Risk of Alzheimer's Disease: A Systematic Review and Meta-Analysis, *J Lifestyle Med*, 2023, 13, 83-89.
84. K. X. Ye, L. A. Sun, L. Y. Wang, A. L. Khoo, K. X. Lim, G. H. Lu, L. R. Yu, C. J. Li, A. B. Maier and L. Feng, The role of lifestyle factors in cognitive health and dementia in oldest-old: A systematic review, *Neuroscience and Biobehavioral Reviews*, 2023, 152.
85. X. Meng, W. Cui, Q. Liang, B. Zhang and Y. Wei, Trends and hotspots in tea and Alzheimer's disease research from 2014 to 2023: A bibliometric and visual analysis, *Heliyon*, 2024, 10, e30063.
86. A. López-García, R. M. López-Fernández and I. Martínez-González-Moro, Analysis of Sleep Quality in People With Dementia: A Preliminary Study, *Gerontology & geriatric medicine*, 2023, 9, 23337214231151473.
87. D. Liu, F. F. Xie, N. M. Zeng, R. F. Han, D. L. Cao, Z. L. Yu, Y. Wang and Z. X. Wan, Urine caffeine metabolites are positively associated with cognitive performance in older adults: An analysis of US National Health and Nutrition Examination Survey (NHANES) 2011 to 2014, *Nutrition Research*, 2023, 109, 12-25.
88. X. Fu, H. Li, X. Chen, J. Cai, T. Yao, L. Song, M. Cen and J. Wu, Associations between urinary caffeine and caffeine metabolites and cognitive function in older adults, *Nutritional neuroscience*, 2023, 26, 594-604.
89. M. E. Andreu-Reinón, M. D. Chirlaque, D. Gavrila, P. Amiano, J. Mar, M. Tainta, E. Ardanaz, R. Larumbe, S. M. Colorado-Yohar, F. Navarro-Mateu, C. Navarro and J. M. Huerta, Mediterranean diet and risk of dementia and alzheimer's disease in the epic-spain dementia cohort study, *Nutrients*, 2021, 13, 1-19.
90. Y. Baba, T. Takihara, Y. Sagesaka and T. Kaneko, Effects of a daily intake of matcha on cognitive function in middle-aged and older subjects —A placebo-controlled, randomized, double-blind, parallel-group study—, *Japanese Pharmacology and Therapeutics*, 2019, 47, 1689-1702.
91. F. N. Yu, N. Q. Hu, X. L. Huang, Y. X. Shi, H. Z. Zhao and H. Y. Cheng, Dietary patterns derived by factor analysis are associated with cognitive function among a middle-aged and elder Chinese population, *Psychiatry Research*, 2018, 269, 640-645.
92. S. G. Qi, Z. H. Wang, C. B. Wei, Z. Yang and X. Q. Zhu, Case-control study on the influencing factors related to cognitive impairment in the elderly population of China, *Zhonghua yu fang yi xue za zhi [Chinese journal of preventive medicine]*, 2018, 52, 926-931.
93. Z. Yin, Z. Fei, C. Qiu, M. S. Brasher, V. B. Kraus, W. Zhao, X. Shi and Y. Zeng, Dietary diversity and cognitive function among elderly people: A population-based study, *Journal of Nutrition, Health and Aging*, 2017, 21, 1089-1094.
94. N. Su, W. Li, X. Li, T. Wang, M. Zhu, Y. Liu, Y. Shi and S. Xiao, The Relationship between the Lifestyle of the Elderly in Shanghai Communities and Mild Cognitive Impairment, *Shanghai archives of psychiatry*, 2017, 29, 352-357.



95. H. Okubo, H. Inagaki, Y. Gondo, K. Kamide, K. Ikebe, Y. Masui, Y. Arai, T. Ishizaki, S. Sasaki, T. Nakagawa, M. Kabayama, K. Sugimoto, H. Rakugi and Y. Maeda, Association between dietary patterns and cognitive function among 70-year-old Japanese elderly: a cross-sectional analysis of the SONIC study, *Nutrition journal*, 2017, 16, 56.
96. H. Arab, S. Mahjoub, K. Hajian-Tilaki and M. Moghadasi, The effect of green tea consumption on oxidative stress markers and cognitive function in patients with Alzheimer's disease: A prospective intervention study, *Caspian journal of internal medicine*, 2016, 7, 188-194.
97. J. Kim, A. Yu, B. Y. Choi, J. H. Nam, M. K. Kim, D. H. Oh and Y. J. Yang, Dietary Patterns Derived by Cluster Analysis are Associated with Cognitive Function among Korean Older Adults, *Nutrients*, 2015, 7, 4154-4169.
98. B. Shakersain, L. Fratiglioni, G. Santoni, S. Larsson, G. Faxén-Irving and W. Xu, Impact of dietary patterns on cognitive decline among dementia-free older adults: A population-based longitudinal study, *Alzheimer's and Dementia*, 2014, 10, P751-P752.
99. X. Chen, Y. Huang and H. G. Cheng, Lower intake of vegetables and legumes associated with cognitive decline among illiterate elderly Chinese: a 3-year cohort study, *The journal of nutrition, health & aging*, 2012, 16, 549-552.
100. Z. Wang, B. Dong, G. Zeng, J. Li, W. Wang, B. Wang and Q. Yuan, Is there an association between mild cognitive impairment and dietary pattern in Chinese elderly? Results from a cross-sectional population study, *BMC public health*, 2010, 10, 595.
101. E. Skrzypczak-Jankun and J. Jankun, Theaflavin digallate inactivates plasminogen activator inhibitor: could tea help in Alzheimer's disease and obesity? *International journal of molecular medicine*, 2010, 26, 45-50.
102. T. Giovannetti, B. M. Bettcher, L. Brennan, D. J. Libon, D. Wambach and C. Seter, Target-related distractors disrupt object selection in everyday action: evidence from participants with dementia, *Journal of the International Neuropsychological Society: JINS*, 2010, 16, 484-494.
103. N. Scarmeas and E. D. Louis, Mediterranean diet and essential tremor. A case-control study, *Neuroepidemiology*, 2007, 29, 170-177.
104. L. F. Low and K. J. Anstey, The public's perception of the plausibility of dementia risk factors is not influenced by scientific evidence, *Dementia and geriatric cognitive disorders*, 2007, 23, 202-206.
105. J. L. Liu, H. Gao, F. Song, X. H. Wang, C. Yang and Z. H. Zhao, Analysis of risk factors of cognitive handicap and senile dementia in honorary retired and ordinary retired cadres from 51 cadre sanatoriums of 11 areas in the Yellow River Valley, *Journal of Clinical Rehabilitative Tissue Engineering Research*, 2007, 11, 5869-5871.
106. T. Kakuda, *Chemoprevention Effect of Tea against Neuronal Death-Dementia*, 2006.
107. D. Jubb, N. Pollard and D. Chaston, Developing services for younger people with dementia, *Nursing times*, 2003, 99, 34-35.
108. J. Rusted and L. Sheppard, Action-based memory in Alzheimer's disease: a longitudinal look at tea making, *Neurocase*, 2002, 8, 111-126.
109. M. A. Rogers and D. G. Simon, A preliminary study of dietary aluminium intake and risk of Alzheimer's disease, *Age and ageing*, 1999, 28, 205-209.
110. G. Fredj, F. Dietlin, G. Barbier, C. Jasmin, L. Bonhomme, S. Esctein, J. L. Misset, P. Meyer, D. Kalifa and T. Beugre, Comparison of tacrine (THA) hepatotoxicity in Alzheimer disease or AIDS patients, *Therapie*, 1992, 47, 245-247.
111. T. Domżał, [Sleep disturbances in multi-infarction dementia and trials of treatment with caffeine], *Neurologia i neurochirurgia polska*, 1990, 24, 133-138.
112. P. French, M. J. Gardner and A. M. Gunn, Dietary aluminium and Alzheimer's disease, *Food and*

chemical toxicology: an international journal published for the British Industrial Biological Research Association, 1989, 27, 495-498.

113. S. M. Schaefer, A. Kaiser, G. Eichner and M. Fasshauer, Association of sugar intake from different sources with incident dementia in the prospective cohort of UK Biobank participants, *Nutrition Journal*, 2023, 22.

114. L. Zhao, R. Zhan, X. Wang, R. Song, M. Han and X. Shen, Correlation between dietary theobromine intake and low cognitive performance in older adults in the United States: A cross-sectional study based on the National Health and Nutrition Examination Survey, *Asia Pacific journal of clinical nutrition*, 2023, 32, 120-132.

115. Z. Sirui, D. Linghui, Q. Shi, L. Yuxiao, W. Xiaochu and D. Birong, The association between tea consumption and the risk of cognitive impairment: Results from the West China Health and Aging Trend (WeCHAT) study, *Asian journal of psychiatry*, 2023, 83, 103521.

116. R. Zhang, L. Zhang, Z. Li, P. Zhang, H. Song, D. A. Yao, J. Cao and J. J. Zhang, Green tea improves cognitive function through reducing AD-pathology and improving anti-oxidative stress capacity in Chinese middle-aged and elderly people, *Frontiers in aging neuroscience*, 2022, 14, 919766.

117. N. J. Zhang, Z. D. Qian, Y. B. Zeng, J. N. Gu, Y. Jin and W. Li, Incidence and risk factors associated with progression to mild cognitive impairment among middle aged and older adults, *European review for medical and pharmacological sciences*, 2022, 26, 8852-8859.

118. S. F. Yin, J. H. Xiao, J. L. Xiong, T. T. Ouyang, Q. Yang, X. Y. Zhu and J. Li, Associations of tea consumption with cognitive function and mental health among older adults in China, *Current Psychology*, 2022, DOI: 10.1007/s12144-022-03962-7.

119. L. Sukik, J. Liu and Z. Shi, Tea Consumption Is Associated with Reduced Cognitive Decline and Interacts with Iron Intake: A Population-Based Longitudinal Study on 4,820 Old Adults, *Journal of Alzheimer's disease : JAD*, 2022, 90, 271-282.

120. W. Li, L. Yue and S. Xiao, Prospective Associations of Tea Consumption With Risk of Cognitive Decline in the Elderly: A 1-Year Follow-Up Study in China, *Frontiers in nutrition*, 2022, 9, 752833.

121. L. Jia, H. Zhao, L. Hao, L. H. Jia, R. Jia and H. L. Zhang, Caffeine intake improves the cognitive performance of patients with chronic kidney disease, *Frontiers in medicine*, 2022, 9, 976244.

122. C. Chen, Z. Lu, X. Wang, J. Zhang, D. Zhang and S. Li, Sugar-sweetened beverages consumption is associated with worse cognitive functions in older adults: from the national health and nutrition examination survey and food patterns equivalents database, *Nutritional neuroscience*, 2022, DOI: 10.1080/1028415x.2022.2115242, 1-8.

123. H. Xu, A. J. Fiocco, X. Liu, T. Wang, G. Li and S. Xiao, Association between tea consumption and cognitive function in cognitively healthy older adults and older adults with mild cognitive impairment, *General psychiatry*, 2021, 34, e100512.

124. I. Paz-Graniel, N. Babio, N. Becerra-Tomás, E. Toledo, L. Camacho-Barcia, D. Corella, O. Castañer-Niño, D. Romaguera, J. Vioque, M. Alonso-Gómez Á, J. Wärnberg, J. A. Martínez, L. Serra-Majem, R. Estruch, F. J. Tinahones, F. Fernandez-Aranda, J. Lapetra, X. Pintó, J. A. Tur, A. García-Rios, A. Bueno-Cavanillas, J. J. Gaforio, P. Matía-Martín, L. Daimiel, V. M. Sánchez, J. Vidal, L. Prieto-Sanchez, E. Ros, C. Razquin, C. Mestres, J. V. Sorli, A. M. Cuenca-Royo, A. Rios, L. Torres-Collado, J. Vaquero-Luna, N. Pérez-Farinós, M. A. Zulet, A. Sanchez-Villegas, R. Casas, M. R. Bernal-Lopez, J. M. Santos-Lozano, X. Corbella, D. Mateos, P. Buil-Cosiales, S. Jiménez-Murcia, R. Fernandez-Carrion, L. Forcano-Gamazo, M. López, M. Sempere-Pascual, A. Moreno-Rodriguez, A. Gea, R. de la Torre-Fornell and J. Salas-Salvadó, Association between coffee consumption and total dietary caffeine intake with cognitive functioning: cross-sectional assessment in an elderly Mediterranean population, *European journal of nutrition*, 2021, 60, 2381-2396.

125. E. J. Okello, N. Mendonça, B. Stephan, G. Muniz-Terrera, K. Wesnes and M. Siervo, Correction to: Tea

consumption and measures of attention and psychomotor speed in the very old: the Newcastle 85+ longitudinal study (BMC Nutrition, (2020), 6, 1, (57), 10.1186/s40795-020-00361-8), BMC nutrition, 2021, 7.

126. M. A. Kromhout, N. Rius Ottenheim, H. Putter, M. E. Numans and W. P. Achterberg, Caffeine Consumption and Behavioral Symptoms in Nursing Home Residents: A Cross-Sectional Analysis, *Journal of Nutrition, Health and Aging*, 2021, 25, 100-107.

127. F. Fisticaro, G. Lanza, M. Pennisi, C. Vagli, M. Cantone, G. Pennisi, R. Ferri and R. Bella, Moderate Mocha Coffee Consumption Is Associated with Higher Cognitive and Mood Status in a Non-Demented Elderly Population with Subcortical Ischemic Vascular Disease, *Nutrients*, 2021, 13.

128. J. Berg, J. Cooper, C. Salonikas, N. Seyedsadjadi and R. Grant, Acute caffeine intake in humans reduces post exercise performance in learning and memory, *Human Psychopharmacology-Clinical and Experimental*, 2021, 36.

129. Y. Baba, T. Kaneko and T. Takihara, Matcha consumption maintains attentional function following a mild acute psychological stress without affecting a feeling of fatigue: A randomized placebo-controlled study in young adults, *Nutrition research (New York, N.Y.)*, 2021, 88, 44-52.

130. J. Zhang, A. Wang, X. Zhang, S. Chen, S. Wu, X. Zhao and Q. Zhang, Association between tea consumption and cognitive impairment in middle-aged and older adults, *BMC geriatrics*, 2020, 20, 447.

131. Z. Wang, J. Hou, Y. Shi, Q. Tan, L. Peng, Z. Deng, Z. Wang and Z. Guo, Influence of Lifestyles on Mild Cognitive Impairment: A Decision Tree Model Study, *Clinical interventions in aging*, 2020, 15, 2009-2017.

132. J. Wang, L. D. Xiao, K. Wang, Y. Luo and X. Li, Cognitive Impairment and Associated Factors in Rural Elderly in North China, *Journal of Alzheimer's disease : JAD*, 2020, 77, 1241-1253.

133. Y. Shirai, K. Kuriki, R. Otsuka, Y. Kato, Y. Nishita, C. Tange, M. Tomida, T. Imai, F. Ando and H. Shimokata, Green tea and coffee intake and risk of cognitive decline in older adults: the National Institute for Longevity Sciences, Longitudinal Study of Aging, *Public health nutrition*, 2020, 23, 1049-1057.

134. Y. X. Qian, Q. H. Ma, H. P. Sun, Y. Xu and C. W. Pan, Combined effect of three common lifestyle factors on cognitive impairment among older Chinese adults: a community-based, cross-sectional survey, *Psychogeriatrics : the official journal of the Japanese Psychogeriatric Society*, 2020, 20, 844-849.

135. E. J. Okello, N. Mendonça, B. Stephan, G. Muniz-Terrera, K. Wesnes and M. Siervo, Tea consumption and measures of attention and psychomotor speed in the very old: the Newcastle 85+ longitudinal study, *BMC nutrition*, 2020, 6, 57.

136. Y. H. Ma, J. H. Wu, W. Xu, X. N. Shen, H. F. Wang, X. H. Hou, X. P. Cao, Y. L. Bi, Q. Dong, L. Feng, L. Tan and J. T. Yu, Associations of Green Tea Consumption and Cerebrospinal Fluid Biomarkers of Alzheimer's Disease Pathology in Cognitively Intact Older Adults: The CABLE Study, *Journal of Alzheimer's disease : JAD*, 2020, 77, 411-421.

137. S. Iranpour, H. M. Saadati, F. Koohi and S. Sabour, Association between caffeine intake and cognitive function in adults; effect modification by sex: Data from National Health and Nutrition Examination Survey (NHANES) 2013-2014, *Clinical nutrition (Edinburgh, Scotland)*, 2020, 39, 2158-2168.

138. X. Dong, S. Li, J. Sun, Y. Li and D. Zhang, Association of Coffee, Decaffeinated Coffee and Caffeine Intake from Coffee with Cognitive Performance in Older Adults: National Health and Nutrition Examination Survey (NHANES) 2011-2014, *Nutrients*, 2020, 12.

139. Y. Baba, S. Inagaki, S. Nakagawa, T. Kaneko, M. Kobayashi and T. Takihara, Effect of Daily Intake of Green Tea Catechins on Cognitive Function in Middle-Aged and Older Subjects: A Randomized, Placebo-Controlled Study, *Molecules (Basel, Switzerland)*, 2020, 25.

140. S. Antwerpes, C. Protopopescu, P. Morlat, F. Marcellin, L. Wittkop, V. Di Beo, D. Salmon-Céron, P. Sogni, L. Michel, M. P. Carrieri and G. The Anrs Co Hepaviv Study, Coffee Intake and Neurocognitive

- Performance in HIV/HCV Coinfected Patients (ANRS CO13 HEPAVIH), *Nutrients*, 2020, 12.
141. J. Zhao, X. Zhang and Z. Li, The Relationship between Cognitive Impairment and Social Vulnerability among the Elderly: Evidence from an Unconditional Quantile Regression Analysis in China, *International journal of environmental research and public health*, 2019, 16.
142. R. K. West, R. Ravona-Springer, A. Livny, A. Heymann, D. Shahar, D. Leroith, R. Preiss, R. Zukran, J. M. Silverman and M. Schnaider-Beeri, Age Modulates the Association of Caffeine Intake With Cognition and With Gray Matter in Elderly Diabetics, *The journals of gerontology. Series A, Biological sciences and medical sciences*, 2019, 74, 683-688.
143. Y. Shirai, K. Kuriki, R. Otsuka, Y. Kato, Y. Nishita, C. Tange, M. Tomida, T. Imai, F. Ando and H. Shimokata, <Editors' Choice> Association between green tea intake and risk of cognitive decline, considering glycated hemoglobin level, in older Japanese adults: the NILS-LSA study, *Nagoya journal of medical science*, 2019, 81, 655-666.
144. A. C. Nutaitis, S. D. Tharwani, M. C. Serra, F. C. Goldstein, L. Zhao, S. S. Sher, D. D. Verble and W. Wharton, Diet as a Risk Factor for Cognitive Decline in African Americans and Caucasians with a Parental History of Alzheimer's Disease: A Cross-Sectional Pilot Study Dietary Patterns, *The journal of prevention of Alzheimer's disease*, 2019, 6, 50-55.
145. R. An, G. Liu, N. Khan, H. Yan and Y. Wang, Dietary Habits and Cognitive Impairment Risk Among Oldest-Old Chinese, *The journals of gerontology. Series B, Psychological sciences and social sciences*, 2019, 74, 474-483.
146. J. Yu, P. Martin, M. Mielke, J. Bower, P. Turcano and R. Savica, Smoking and coffee consumption preceding clinically-diagnosed synucleinopathies: A casecontrol study in Olmsted County MN (1991- 2005)A, *Neurology*, 2018, 90.
147. H. Xu, Y. Wang, Y. Yuan, X. Zhang, X. Zuo, L. Cui, Y. Liu, W. Chen, N. Su, H. Wang, F. Yan, X. Li, T. Wang and S. Xiao, Gender differences in the protective effects of green tea against amnesic mild cognitive impairment in the elderly Han population, *Neuropsychiatric disease and treatment*, 2018, 14, 1795-1801.
148. Y. J. Gu, C. H. He, S. Li, S. Y. Zhang, S. Y. Duan, H. P. Sun, Y. P. Shen, Y. Xu, J. Y. Yin and C. W. Pan, Tea consumption is associated with cognitive impairment in older Chinese adults, *Aging & mental health*, 2018, 22, 1232-1238.
149. L. Feng, L. Langsetmo, K. Yaffe, Y. Sun, H. A. Fink, J. M. Shikany, P. C. Leung, N. E. Lane and J. A. Cauley, No Effects of Black Tea on Cognitive Decline Among Older US Men: A Prospective Cohort Study, *Journal of Alzheimer's disease: JAD*, 2018, 65, 99-105.
150. S. P. Chan, P. Z. Yong, Y. Sun, R. Mahendran, J. C. M. Wong, C. Qiu, T. P. Ng, E. H. Kua and L. Feng, Associations of Long-Term Tea Consumption with Depressive and Anxiety Symptoms in Community-Living Elderly: Findings from the Diet and Healthy Aging Study, *The journal of prevention of Alzheimer's disease*, 2018, 5, 21-25.
151. T. Wang, S. Xiao, K. Chen, C. Yang, S. Dong, Y. Cheng, X. Li, J. Wang, M. Zhu, F. Yang, G. Li, N. Su, Y. Liu, J. Dai and M. Zhang, Prevalence, Incidence, Risk and Protective Factors of Amnesic Mild Cognitive Impairment in the Elderly in Shanghai, *Current Alzheimer research*, 2017, 14, 460-466.
152. M. A. Kromhout, M. E. Numans and W. P. Achterberg, Reducing behavioral symptoms in older patients with dementia by regulating caffeine consumption: Two single-subject trials, *European Geriatric Medicine*, 2017, 8, 496-498.
153. S. Haller, M. L. Montandon, C. Rodriguez, D. Moser, S. Toma, J. Hofmeister and P. Giannakopoulos, Caffeine impact on working memory-related network activation patterns in early stages of cognitive decline, *Neuroradiology*, 2017, 59, 387-395.

154. K. Sharma, G. Munro, S. Ankrett, T. Davis and E. Coulthard, THE DE-CAFF STUDY: CAFFEINE in COGNITIVE IMPAIRMENT, *Journal of Neurology, Neurosurgery and Psychiatry*, 2016, 87.
155. C. S. Perry, 3rd, A. K. Thomas, H. A. Taylor, P. F. Jacques and R. B. Kanarek, The impact of caffeine use across the lifespan on cognitive performance in elderly women, *Appetite*, 2016, 107, 69-78.
156. K. Kitamura, Y. Watanabe, K. Nakamura, K. Sanpei, M. Wakasugi, A. Yokoseki, O. Onodera, T. Ikeuchi, R. Kuwano, T. Momotsu, I. Narita and N. Endo, Modifiable Factors Associated with Cognitive Impairment in 1,143 Japanese Outpatients: The Project in Sado for Total Health (PROST), *Dementia and geriatric cognitive disorders extra*, 2016, 6, 341-349.
157. K. Ide, H. Yamada, N. Takuma, Y. Kawasaki, S. Harada, J. Nakase, Y. Ukawa and Y. M. Sagesaka, Effects of green tea consumption on cognitive dysfunction in an elderly population: a randomized placebo-controlled study, *Nutrition journal*, 2016, 15, 49.
158. L. Feng, M. S. Chong, W. S. Lim, Q. Gao, M. S. Nyunt, T. S. Lee, S. L. Collinson, T. Tsoi, E. H. Kua and T. P. Ng, Tea Consumption Reduces the Incidence of Neurocognitive Disorders: Findings from the Singapore Longitudinal Aging Study, *The journal of nutrition, health & aging*, 2016, 20, 1002-1009.
159. M. Eskelinen, G. Spulber, T. Ngandu, M. Kivipelto, H. Soininen and A. Solomon, Midlife coffee drinking and dementia-related brain changes on MRI up to 28 years later, *European journal of neurology*, 2016, 23, 251.
160. L. F. Araújo, S. S. Mirza, D. Bos, W. J. Niessen, S. M. Barreto, A. Van Der Lugt, M. W. Vernooij, A. Hofman, H. Tiemeier, M. A. Ikram and M. C. Polidori, Association of Coffee Consumption with MRI Markers and Cognitive Function: A Population-Based Study, *Journal of Alzheimer's Disease*, 2016, 53, 451-461.
161. E. R. Walters and V. E. Lesk, Time of day and caffeine influence some neuropsychological tests in the elderly. *Psychological assessment*, 2015, 27, 161-168.
162. B. Venci, N. Hodac, S. Y. Lee, M. Shidler and R. Krikorian, Beverage Consumption Patterns and Micronutrient and Caloric Intake from Beverages in Older Adults with Mild Cognitive Impairment, *Journal of nutrition in gerontology and geriatrics*, 2015, 34, 399-409.
163. V. Solfrizzi, F. Panza, B. P. Imbimbo, A. D'Introno, L. Galluzzo, C. Gandin, G. Misciagna, V. Guerra, A. Osella, M. Baldereschi, A. Di Carlo, D. Inzitari, D. Seripa, A. Pilotto, C. Sabbá, G. Logroscino and E. Scafato, Coffee Consumption Habits and the Risk of Mild Cognitive Impairment: The Italian Longitudinal Study on Aging, *Journal of Alzheimer's disease: JAD*, 2015, 47, 889-899.
164. W. Shen, Y. Xiao, X. Ying, S. Li, Y. Zhai, X. Shang, F. Li, X. Wang, F. He and J. Lin, Erratum: Tea Consumption and Cognitive Impairment: A Cross-Sectional Study among Chinese Elderly (PLoS ONE (2015) 10:9 (e0137781) (DOI:10.1371/journal.pone.0137781)), *PloS one*, 2015, 10.
165. W. Shen, Y. Xiao, X. Ying, S. Li, Y. Zhai, X. Shang, F. Li, X. Wang, F. He and J. Lin, Tea Consumption and Cognitive Impairment: A Cross-Sectional Study among Chinese Elderly, *PloS one*, 2015, 10, e0137781.
166. A. V. Kuczmarski, N. Cotugna, M. A. Mason, M. K. Evans and A. B. Zonderman, Depression and Cognitive Impairment Are Associated with Low Education and Literacy Status and Smoking but Not Caffeine Consumption in Urban African Americans and White Adults, *Journal of caffeine research*, 2015, 5, 31-41.
167. L. F. Araujo, L. Giatti, R. C. P. dos Reis, A. C. Goulart, M. I. Schmidt, B. B. Duncan, M. A. Ikram and S. M. Barreto, Inconsistency of Association between Coffee Consumption and Cognitive Function in Adults and Elderly in a Cross-Sectional Study (ELSA-Brasil), *Nutrients*, 2015, 7, 9590-9601.
168. K. Ritchie, M. L. Ancelin, H. Amieva, O. Rouaud and I. Carrière, The association between caffeine and cognitive decline: examining alternative causal hypotheses, *International psychogeriatrics*, 2014, 26, 581-590.
169. M. A. Kromhout, J. Jongerling and W. P. Achterberg, Relation between caffeine and behavioral

- symptoms in elderly patients with dementia: an observational study, *The journal of nutrition, health & aging*, 2014, 18, 407-410.
170. K. Ide, H. Yamada, N. Takuma, M. Park, N. Wakamiya, J. Nakase, Y. Ukawa and Y. M. Sagesaka, Green tea consumption affects cognitive dysfunction in the elderly: a pilot study, *Nutrients*, 2014, 6, 4032-4042.
171. D. E. Hosking, T. Nettelbeck, C. Wilson and V. Danthiir, Retrospective lifetime dietary patterns predict cognitive performance in community-dwelling older Australians, *The British journal of nutrition*, 2014, 112, 228-237.
172. M. A. Beydoun, A. A. Gamaldo, H. A. Beydoun, T. Tanaka, K. L. Tucker, S. A. Talegawkar, L. Ferrucci and A. B. Zonderman, Caffeine and alcohol intakes and overall nutrient adequacy are associated with longitudinal cognitive performance among U.S. adults, *Journal of Nutrition*, 2014, 144, 890-901.
173. M. N. Vercambre, C. Berr, K. Ritchie and J. H. Kang, Caffeine and cognitive decline in elderly women at high vascular risk, *Journal of Alzheimer's disease. JAD*, 2013, 35, 413-421.
174. S. Haller, C. Rodriguez, D. Moser, S. Toma, J. Hofmeister, I. Sinanaj, D. Van De Ville, P. Giannakopoulos and K. O. Lovblad, ACUTE CAFFEINE ADMINISTRATION IMPACT ON WORKING MEMORY-RELATED BRAIN ACTIVATION AND FUNCTIONAL CONNECTIVITY IN THE ELDERLY: A BOLD AND PERFUSION MRI STUDY, *Neuroscience*, 2013, 250, 364-371.
175. K. H. Alzoubi, K. K. Abdul-Razzak, O. F. Khabour, G. M. Al-Tuweiq, M. A. Alzubi and K. A. Alkadhi, Caffeine prevents cognitive impairment induced by chronic psychosocial stress and/or high fat-high carbohydrate diet, *Behavioural brain research*, 2013, 237, 7-14.
176. Y. Tomata, M. Kakizaki, N. Nakaya, T. Tsuboya, T. Sone, S. Kuriyama, A. Hozawa and I. Tsuji, Green tea consumption and the risk of incident functional disability in elderly Japanese: the Ohsaki Cohort 2006 Study, *The American journal of clinical nutrition*, 2012, 95, 732-739.
177. L. Qiu, J. Sautter and D. Gu, Associations between frequency of tea consumption and health and mortality: evidence from old Chinese, *The British journal of nutrition*, 2012, 108, 1686-1697.
178. E. B. Mukaetova-Ladinska, K. Purshouse, J. Andrade, M. Krishnan, C. Jagger and R. N. Kalaria, Can healthy lifestyle modify risk factors for dementia? findings from a pilot community-based survey in Chennai (India) and Newcastle (UK), *Neuroepidemiology*, 2012, 39, 163-170.
179. L. Feng, J. Li, T. P. Ng, T. S. Lee, E. H. Kua and Y. Zeng, Tea drinking and cognitive function in oldest-old Chinese, *The journal of nutrition, health & aging*, 2012, 16, 754-758.
180. C. Butchart, J. Kyle, G. McNeill, J. Corley, A. J. Gow, J. M. Starr and I. J. Deary, Flavonoid intake in relation to cognitive function in later life in the Lothian Birth Cohort 1936, *The British journal of nutrition*, 2011, 106, 141-148.
181. L. Arab, M. L. Biggs, E. S. O'Meara, W. T. Longstreth, P. K. Crane and A. L. Fitzpatrick, Gender differences in tea, coffee, and cognitive decline in the elderly: the Cardiovascular Health Study, *Journal of Alzheimer's disease. JAD*, 2011, 27, 553-566.
182. P. Trimpou, K. Landin-Wilhelmsen, A. Odén, A. Rosengren and L. Wilhelmsen, Male risk factors for hip fracture-a 30-year follow-up study in 7,495 men, *Osteoporosis international. a journal established as result of cooperation between the European Foundation for Osteoporosis and the National Osteoporosis Foundation of the USA*, 2010, 21, 409-416.
183. C. Santos, N. Lunet, A. Azevedo, A. de Mendonça, K. Ritchie and H. Barros, Caffeine intake is associated with a lower risk of cognitive decline: a cohort study from Portugal, *Journal of Alzheimer's disease : JAD*, 2010, 20 Suppl 1, S175-185.
184. K. Ritchie, S. Artero, F. Portet, A. Brickman, J. Muraskin, E. Beanino, M. L. Ancelin and I. Carrière, Caffeine, cognitive functioning, and white matter lesions in the elderly: establishing causality from

- epidemiological evidence, *Journal of Alzheimer's disease*. JAD, 2010, 20 Suppl 1, S161-166.
185. J. Kyle, H. C. Fox and L. J. Whalley, Caffeine, cognition, and socioeconomic status, *Journal of Alzheimer's disease*. JAD, 2010, 20 Suppl 1, S151-159.
186. L. Feng, X. Gwee, E. H. Kua and T. P. Ng, Cognitive function and tea consumption in community dwelling older Chinese in Singapore, *Journal of Nutrition, Health and Aging*, 2010, DOI: 10.1007/s12603-010-0095-9, 1-6.
187. E. Nurk, H. Refsum, C. A. Drevon, G. S. Tell, H. A. Nygaard, K. Engedal and A. D. Smith, Intake of flavonoid-rich wine, tea, and chocolate by elderly men and women is associated with better cognitive test performance<sup>1-3</sup>, *Journal of Nutrition*, 2009, 139, 120-127.
188. K. Niu, A. Hozawa, S. Kuriyama, S. Ebihara, H. Guo, N. Nakaya, K. Ohmori-Matsuda, H. Takahashi, Y. Masamune, M. Asada, S. Sasaki, H. Arai, S. Awata, R. Nagatomi and I. Tsuji, Green tea consumption is associated with depressive symptoms in the elderly, *American Journal of Clinical Nutrition*, 2009, 90, 1615-1622.
189. C. Q. Huang, B. R. Dong, Y. L. Zhang, H. M. Wu and Q. X. Liu, Association of cognitive impairment with smoking, alcohol consumption, tea consumption, and exercise among Chinese nonagenarians/centenarians, *Cognitive and behavioral neurology : official journal of the Society for Behavioral and Cognitive Neurology*, 2009, 22, 190-196.
190. G. K. Harris and C. R. Summers, The Potential of Caffeine for the Inhibition of Cognitive Decline in the Aged, 2009.
191. H. D. Tang, Y. H. Yao, R. F. Xu, S. D. Chen and Q. Cheng, Analysis of cognitive impairment and associated factors of the elderly in Shanghai suburbs, *Chinese Journal of Contemporary Neurology and Neurosurgery*, 2008, 8, 318-322.
192. D. Norman, W. A. Bardwell, J. S. Lored, S. Ancoli-Israel, R. K. Heaton and J. E. Dimsdale, Caffeine intake is independently associated with neuropsychological performance in patients with obstructive sleep apnea, *Sleep & breathing = Schlaf & Atmung*, 2008, 12, 199-205.
193. T. P. Ng, L. Feng, M. Niti, E. H. Kua and K. B. Yap, Tea consumption and cognitive impairment and decline in older Chinese adults, *The American journal of clinical nutrition*, 2008, 88, 224-231.
194. A. V. Chin, D. J. Robinson, H. O'Connell, F. Hamilton, I. Bruce, R. Coen, B. Walsh, D. Coakley, A. Molloy, J. Scott, B. A. Lawlor and C. J. Cunningham, Vascular biomarkers of cognitive performance in a community-based elderly population: the Dublin Healthy Ageing study, *Age and ageing*, 2008, 37, 559-564.
195. B. M. van Gelder, B. Buijsse, M. Tijhuis, S. Kalmijn, S. Giampaoli, A. Nissinen and D. Kromhout, Coffee consumption is inversely associated with cognitive decline in elderly European men: the FINE Study, *European journal of clinical nutrition*, 2007, 61, 226-232.
196. K. Ritchie, I. Carrière, A. de Mendonca, F. Portet, J. F. Dartigues, O. Rouaud, P. Barberger-Gateau and M. L. Ancelin, The neuroprotective effects of caffeine: a prospective population study (the Three City Study), *Neurology*, 2007, 69, 536-545.
197. S. K. Wang, H. S. Choi, Y. O. Shin, I. S. Chee, S. W. Lee and J. L. Kim, Effect of caffeine on daytime sleepiness and cognitive dysfunction induced by sleep deprivation, *European Neuropsychopharmacology*, 2004, 14, S358-S359.
198. B. M. van Gelder, B. Buijsse, S. Kalmijn, M. Tijhuis, S. Giampaoli, A. Nissinen and D. Kromhout, Moderate coffee consumption is associated with a less rapid cognitive decline in elderly men. The fine study, *Neurobiology of aging*, 2004, 25, S481-S481.
199. M. H. Wong, K. F. Fung and H. P. Carr, Aluminium and fluoride contents of tea, with emphasis on brick tea and their health implications, *Toxicology letters*, 2003, 137, 111-120.
200. M. G. Weisskopf, H. L. Chen, M. A. Schwarzschild, I. Kawachi and A. Ascherio, Prospective study of

- phobic anxiety and risk of Parkinson's disease, *Movement Disorders*, 2003, 18, 646-651.
201. E. D. Louis, J. A. Luchsinger, M. X. Tang and R. Mayeux, Parkinsonian signs in older people: Prevalence and associations with smoking and coffee, *Neurology*, 2003, 61, 24-28.
202. M. Johnson-Kozlow, D. Kritz-Silverstein, E. Barrett-Connor and D. Morton, Coffee consumption and cognitive function among older adults, *American journal of epidemiology*, 2002, 156, 842-850.
203. S. M. Dursun, H. A. Robertson, D. Bird, D. Kutcher and S. P. Kutcher, Effects of ageing on prefrontal temporal cortical network function in healthy volunteers as assessed by COWA: An exploratory survey, *Progress in Neuro-Psychopharmacology and Biological Psychiatry*, 2002, 26, 1007-1010.
204. F. Manes, J. R. Hodges, K. S. Graham and A. Zeman, Focal autobiographical amnesia in association with transient epileptic amnesia, *Brain*, 2001, 124, 499-509.
205. P. A. H. M. Hameleers, M. P. J. Van Boxtel, E. Hogervorst, W. J. Riedel, P. J. Houx, F. Buntinx and J. Jolles, Habitual caffeine consumption and its relation to memory, attention, planning capacity and psychomotor performance across multiple age groups, *Human psychopharmacology*, 2000, 15, 573-581.
206. J. Kanis, O. Johnell, B. Gullberg, E. Allander, L. Elffors, J. Ranstam, J. Dequeker, G. Dilsen, C. Gennari, A. Lopes Vaz, G. Lyritis, G. Mazzuoli, L. Miravet, M. Passeri, R. Perez Cano, A. Rapado and C. Ribot, Risk factors for hip fracture in men from southern europe: The MEDOS study, *Osteoporosis International*, 1999, 9, 45-54.
207. W. J. Riedel and B. L. Jorissen, Nutrients, age and cognitive function, *Current opinion in clinical nutrition and metabolic care*, 1998, 1, 579-585.
208. G. Davila and J. F. Navarro, Psychopathology and sleep. IV. Other disorders, *Behavioral Psychology-Psicologia Conductual*, 1998, 6, 275-293.
209. R. Ginsburg and M. Weintraub, Caffeine in the "sundown syndrome." Report of negative results, *Journal of gerontology*, 1976, 31, 419-420.
210. F. B. Lin, Y. S. Shi, X. Y. Zou, H. C. Wang, S. B. Fu, X. F. Wang, Z. Q. Yang, G. F. Cai, G. E. Cai and X. L. Wu, Coffee consumption and all-cause and cardiovascular mortality in older adults: should we consider cognitive function?, *Frontiers in Nutrition*, 2023, 10.
211. C. Wei, J. Zhang, N. Chen, Z. Xu and H. Tang, Does frequent tea consumption provide any benefit to cognitive function in older adults? Evidence from a national survey from China in 2018, *Frontiers in public health*, 2023, 11, 1269675.
212. J. W. Hou, H. Jiang, Y. Han, R. Huang, X. Gao, W. Feng and Z. J. Guo, Lifestyle Influence on Mild Cognitive Impairment Progression: A Decision Tree Prediction Model Study, *Neuropsychiatric Disease and Treatment*, 2024, 20, 271-280.
213. L. Yu, M. Yang, K. X. Ye, C. Li, M. Zou, J. Wang, X. Yuan, D. Zheng, C. Sun, Y. Zhang, Q. Feng, A. B. Maier, L. Sun, L. Feng, Y. Wang, H. Chen and Y. Zeng, Investigating the Impact of Tea Consumption on Cognitive Function and Exploring Tea-Genetic Interactions in Older Adults Aged 65–105 Years: Findings from the 2002–2018 CLHLS Data, *Journal of Prevention of Alzheimer's Disease*, 2024, 11, 769-779.
214. F. Fisicaro, G. Lanza, M. Pennisi, C. Vagli, M. Cantone, G. Pennisi, R. Ferri and R. Bella, Mocha coffee consumption correlates with cognitive function in a population with subcortical ischemic vascular disease, *European journal of neurology*, 2021, 28, 577-578.
215. T. Kawada, Tea and coffee consumption, cognitive impairment and prognosis in older inhabitants, *EXCLI journal*, 2020, 19, 1385-1386.
216. W. H. Pan, Taiwanese eating approach (TEA) associated with cognitive decline in elderlies, *Annals of Nutrition and Metabolism*, 2019, 75, 35.
217. D. Blum, A. Farah and L. V. Lopes, Coffee and Alzheimer's Disease. 2019.



218. , Drinking Tea could help stave off cognitive Decline, *Deutsche Lebensmittel-Rundschau*, 2019, 115, 470-470.
219. C. C. Jung, S. C. Chu, J. H. Chen, T. F. Chen, P. K. Yip, Y. M. Chu, Y. Sun, L. L. Wen and Y. C. Chen, Consumption of coffee or tea, vascular risk factors and the risk of dementia in the elderly, *Alzheimer's and Dementia*, 2016, 12, P590.
220. M. Shinohara, S. Yuki, C. Dohmoto, Y. Ikeda, M. Samuraki, K. Iwasa, M. Yokogawa, K. Asai, K. Komai, H. Nakamura and M. Yamada, Consumption of green tea is associated with reduced risk of cognitive decline, *Neurodegenerative Diseases*, 2015, 15, 408.
221. M. P. Chute, D. C. Hsu, S. E. Wigman, C. E. Munro, S. Y. Jaimes, A. S. Dagley, E. C. Mormino, T. Hedden, A. P. Schultz, K. V. Papp, R. Amariglio, R. A. Sperling and D. M. Rentz, Moderate caffeine consumption is associated with better memory scores in clinically normal older adults, *Alzheimer's and Dementia*, 2015, 11, P715-P716.
222. I. Bojar, Prophylaxis of cognitive functions disorders progressing with age in women, *Annals of Agricultural and Environmental Medicine*, 2015, 22, 573-575.
223. P. H. Weng, Y. C. Chen, T. F. Chen, Y. Sun, L. L. Wen, P. K. Yip, Y. M. Chu and J. H. Chen, Caffeine intake and cognitive response to acetylcholinesterase inhibitors in Alzheimer's disease, *Alzheimer's and Dementia*, 2014, 10, P456.
224. S. S. Mirza, H. Tiemeier, R. F. A. G. De Bruijn, A. Hofman, O. Franco, J. De Jong, P. Koudstaal and M. A. Ikram, The healthy coffee-drinker effect: Different short-and long-term associations between coffee intake and dementia, *Alzheimer's and Dementia*, 2014, 10, P295-P296.
225. S. Haller, C. Rodriguez, D. Moser, S. Toma, J. Hofmeister, I. Sinanaj, D. Van De Ville, P. Giannakopoulos and K. O. Lovblad, Caffeine in the elderly and MCI, *Neuroradiology*, 2014, 56, 154-155.
226. L. Feng, T. P. Ng, Y. Zeng and E. H. Kua, Tea consumption and neurocognitive function in late life: Findings from Singapore and china, *Annals of the Academy of Medicine Singapore*, 2014, 43, S24-S25.
227. B. Venci, N. Hodac, M. Shidler, S. Lee and R. Krikorian, Patterns, micronutrient and caloric intake from beverages in older adults with mild cognitive impairment, *Annals of Nutrition and Metabolism*, 2013, 63, 644.
228. U. Suttisansanee and J. Tonglim, In vitro potential properties of conventional and herbal teas against key enzymes relevant to alzheimer's disease, *Annals of Nutrition and Metabolism*, 2013, 63, 1621.
229. V. Solfrizzi, C. Sabbà, F. Panza, E. Scafato and G. Logroscino, Coffee consumption and mild cognitive impairment: Italian longitudinal study on aging, *Neurology*, 2013, 80.
230. Y. So, J. W. Han, T. H. Kim, J. Y. Seo, K. Y. Kim and K. W. Kim, High dietary supplements are associated with a decreased risk of cognitive impairment: A cohort study from KLOSCAD, *International psychogeriatrics*, 2013, 25, S190.
231. Y. So, J. W. Han, T. H. Kim and K. W. Kim, High use of dietary supplements is associated with a decreased risk of cognitive impairment: A cohort study from KLOSCAD, *Alzheimer's and Dementia*, 2013, 9, P803.
232. H. Seo, H. Kim and K. J. Lee, Assessment of autonomic function in Alzheimer's disease and mild cognitive impairment, *International psychogeriatrics*, 2013, 25, S114.
233. S. Noel, J. Manjourides, T. M. Scott, A. Spiro Iii and K. L. Tucker, Coffee intake and cognitive functioning in men, *FASEB Journal*, 2013, 27.
234. J. Kim, A. Yu, B. Y. Choi, J. H. Nam, M. K. Kim, D. H. Oh and Y. J. Yang, Dietary patterns of Korean older adults and cognitive function, *FASEB Journal*, 2013, 27.
235. K. Ide, N. Wakamiya, M. Park, N. Takuma, S. Fujii, A. Nakahara, T. Suzuki, J. Nakase, Y. Ukawa, Y. M. Sagesaka and H. Yamada, Effects of green tea consumption on cognitive dysfunction: An exploratory clinical

- study, *Journal of the neurological sciences*, 2013, 333, e298.
236. F. Dal Moro, Coffee and cognitive stimulation, *Maturitas*, 2013, 75, 191.
237. U. Lucca, A. Recchia, M. Garri, E. Riva, A. Nobili, L. Pasina, C. Franchi, C. Djade and M. Tettamanti, Coffee consumption and the risk of dementia in the oldest-old: The monzino 80-plus study, *Alzheimer's and Dementia*, 2012, 8, P629-P630.
238. K. Hermansen, K. S. Krogholm, B. H. Bech, L. O. Dragsted, L. Hyldstrup, K. Jørgensen, M. L. Larsen and A. M. Tjønneland, [Coffee can protect against disease], *Ugeskrift for læger*, 2012, 174, 2293-2297.
239. B. Boot, C. Orr, T. Ferman, R. Roberts, V. Pankratz, D. Dickson, J. Ahlskog, D. Knopman, R. Petersen and B. Boeve, Risk factors for dementia with lewy bodies, *Neurology*, 2012, 78.
240. J. E. James, X. Chen, M. Morelli, R. Postuma and M. A. Schwarzschild, The putative neuroprotective effects of caffeine, *Journal of caffeine research*, 2011, 1, 91-96.
241. T. Blackwell, K. Stone, S. Ancoli-Israel, K. Ensrud, J. Cauley, S. Redline, T. Hillier and K. Yaffe, Circadian activity rhythms and risk of incident dementia and mild cognitive impairment in older women, *Alzheimer's and Dementia*, 2011, 7, S373.
242. , Green tea protects against Alzheimer's and cancer, *Perspectives in Public Health*, 2011, 131, 51-51.
243. , Mystery Ingredient in Coffee Boosts Protection Against Alzheimer's Disease, *American Journal of Alzheimers Disease and Other Dementias*, 2011, 26, 498-499.
244. A. Mendonça and R. A. Cunha, Therapeutic opportunities for caffeine in Alzheimer's disease and other neurodegenerative disorders, *Journal of Alzheimer's Disease*, 2010, 20, S1-S2.
245. I. Durr, D. Krause and G. Nittner, Coffee and Alzheimer Disease, 2010.
246. A. de Mendonça and R. A. Cunha, Therapeutic opportunities for caffeine in Alzheimer's disease and other neurodegenerative disorders, *Journal of Alzheimer's disease : JAD*, 2010, 20 Suppl 1, S1-2.
247. , New Evidence Caffeine May Slow AD and Other Dementias, Restore Cognitive Function, *American Journal of Alzheimers Disease and Other Dementias*, 2010, 25, 535-535.
248. M. Tabaton, Coffee "breaks" Alzheimer's disease, *Journal of Alzheimer's disease : JAD*, 2009, 17, 699-700; discussion 701-692.
249. V. Schulz, Drinking tea (*Camellia sinensis*) reduces the risk of dementia in old age: Epidemiological study with 2,500 participants in Singapore, *Zeitschrift fur Phytotherapie*, 2009, 30, 22-23.
250. M. H. Eskelinen, J. Tuomilehto, H. Soininen and M. Kivipelto, Healthy diet at midlife and the risk of late-life dementia and Alzheimer's disease: A population-based CAIDE study, *Alzheimer's and Dementia*, 2009, 5, 284.
251. G. W. Arendash, Coffee "Breaks" Alzheimer's Disease Response to Commentary, *Journal of Alzheimers Disease*, 2009, 17, 701-702.
252. , Drinking Coffee May Reduce Alzheimer's Risk, *Psychiatric Annals*, 2009, 39, 46-46.
253. S. K. Wang, J. L. Kim, I. S. Chee and M. R. Ku, Modafinil and caffeine reversal on daytime sleepiness and cognitive dysfunction induced by sleep deprivation, *European Neuropsychopharmacology*, 2008, 18, S274-S275.
254. B. Giunta, D. Obregon, H. Y. Hou, J. Zeng, N. Sun, V. Nikolic, J. Ehrhart, D. Shytle, F. Fernandez and J. Tan, Neuroprotection of green tea derived EGCG: Implications for HIV associated dementia, *Faseb Journal*, 2007, 21, A1175-A1175.
255. J. L. Barranco-Quintana, M. F. Allam, A. S. Del Castillo and R. F. C. Navajas, Neurodegenerative diseases and tea [1], *Revista de neurologia*, 2007, 44, 381-382.
256. W. P. Cheshire Jr, Drugs for enhancing cognition and their ethical implications: A hot new cup of tea, *Expert review of neurotherapeutics*, 2006, 6, 263-266.

257. , Both green and black tea could protect against age-related diseases like Alzheimer's, *Agro Food Industry Hi-Tech*, 2006, 17, XXVI-XXVII.
258. , Green tea, RNA, and Alzheimer's, *Chemical & Engineering News*, 2005, 83, 35-35.
259. A. De Mendonca and L. Maia, Caffeine as protective factor for Alzheimer's disease, *Neurobiology of aging*, 2002, 23, S433-S433.
260. M. Meydani, Nutrition interventions in aging and age-associated disease. *Journal*, 2001, 928, 226-235.
261. Can drinking green tea benefit people with Alzheimer's disease? *Journal of advanced nursing*, 2001, 33, 277-278.
262. S. Zappettini, E. Faivre, A. Ghestem, S. Carrier, L. Buée, D. Blum, M. Esclapez and C. Bernard, Caffeine Consumption During Pregnancy Accelerates the Development of Cognitive Deficits in Offspring in a Model of Tauopathy, *Frontiers in cellular neuroscience*, 2019, 13, 438.
263. Y. Wang, Y. Wang, J. Li, L. Hua, B. Han, Y. Zhang, X. Yang, Z. Zeng, H. Bai, H. Yin and J. Lou, Effects of caffeic acid on learning deficits in a model of Alzheimer's disease. *International journal of molecular medicine*, 2016, 38, 869-875.
264. M. Hashimoto, M. A. Haque and Y. Hara, Effect of Green Tea Catechins on Cognitive Learning Ability and Dementia, 2013.
265. S. Vila-Luna, S. Cabrera-Isidoro, L. Vila-Luna, I. Juárez-Díaz, J. L. Bata-García, F. J. Alvarez-Cervera, R. E. Zapata-Vázquez, G. Arankowsky-Sandoval, F. Heredia-López, G. Flores and J. L. Góngora-Alfaro, Chronic caffeine consumption prevents cognitive decline from young to middle age in rats, and is associated with increased length, branching, and spine density of basal dendrites in CA1 hippocampal neurons, *Neuroscience*, 2012, 202, 384-395.
266. G. W. Arendash and C. Cao, Caffeine and coffee as therapeutics against Alzheimer's disease, *Journal of Alzheimer's disease. JAD*, 2010, 20 Suppl 1, S117-126.
267. R. Quirion, Tea leaves Alzheimer's disease behind, *Healthcare quarterly (Toronto, Ont.)*, 2006, 9, 21-22.
268. Y. C. Chan, K. Hosoda, C. J. Tsai, S. Yamamoto and M. F. Wang, Favorable effects of tea on reducing the cognitive deficits and brain morphological changes in senescence-accelerated mice, *Journal of nutritional science and vitaminology*, 2006, 52, 266-273.
269. S. L. Rovner, Untangling Alzheimer's, *Chemical & Engineering News*, 2005, 83, 38-+.
270. X. Jiang, L. Cui, L. Huang, Y. Guo, G. Huang and Q. Guo, The Relationship between Beverages Consumption and Cognitive Impairment in Middle-Aged and Elderly Chinese Population, *Nutrients*, 2023, 15.
271. T. Filippini, G. Adani, M. Malavolti, C. Garuti, S. Cilloni, G. Vinceti, G. Zamboni, M. Tondelli, C. Galli, M. Costa, A. Chiari and M. Vinceti, Dietary Habits and Risk of Early-Onset Dementia in an Italian Case-Control Study, *Nutrients*, 2020, 12.
272. S. Y. Chuang, Y. L. Lo, S. Y. Wu, P. N. Wang and W. H. Pan, Dietary Patterns and Foods Associated With Cognitive Function in Taiwanese Older Adults: The Cross-sectional and Longitudinal Studies, *Journal of the American Medical Directors Association*, 2019, 20, 544-550.e544.
273. L. Tremolizzo, E. Bianchi, E. Susani, E. Pupillo, P. Messina, A. Aliprandi, A. Salmaggi, M. Cosseddu, A. Pilotto, B. Borroni, A. Padovani, C. Bonomini, O. Zanetti, I. Appollonio, E. Beghi and C. Ferrarese, Voluntary Habits and Risk of Frontotemporal Dementia: A Case Control Retrospective Study, *Journal of Alzheimer's disease : JAD*, 2017, 60, 335-340.
274. C. Y. Lee, Y. Sun, H. J. Lee, T. F. Chen, P. N. Wang, K. N. Lin, L. Y. Tang, C. C. Lin and M. J. Chiu, Modest Overweight and Healthy Dietary Habits Reduce Risk of Dementia: A Nationwide Survey in Taiwan, *The journal of prevention of Alzheimer's disease*, 2017, 4, 37-43.
275. B. P. Boot, C. F. Orr, J. E. Ahlskog, T. J. Ferman, R. Roberts, V. S. Pankratz, D. W. Dickson, J. Parisi, J.

- A. Aakre, Y. E. Geda, D. S. Knopman, R. C. Petersen and B. F. Boeve, Risk factors for dementia with Lewy bodies: a case-control study, *Neurology*, 2013, 81, 833-840.
276. L. Maia and A. de Mendonça, Does caffeine intake protect from Alzheimer's disease?, *European journal of neurology*, 2002, 9, 377-382.
277. D. P. Forster, A. J. Newens, D. W. Kay and J. A. Edwardson, Risk factors in clinically diagnosed presenile dementia of the Alzheimer type: a case-control study in northern England, *Journal of epidemiology and community health*, 1995, 49, 253-258.
278. G. A. Broe, A case-control study of Alzheimer's disease in Australia, 1990.
279. Y. Zhang, H. Yang, S. Li, Z. Cao, W. D. Li, T. Yan and Y. Wang, Association of coffee and genetic risk with incident dementia in middle-aged and elderly adults, *Nutritional neuroscience*, 2022, 25, 2359-2368.
280. S. M. Schaefer, A. Kaiser, I. Behrendt, G. Eichner and M. Fasshauer, Association of Alcohol Types, Coffee, and Tea Intake with Risk of Dementia: Prospective Cohort Study of UK Biobank Participants, *Brain Sciences*, 2022, 12.
281. H. Y. Hu, B. S. Wu, Y. N. Ou, Y. H. Ma, Y. Y. Huang, W. Cheng, L. Tan and J. T. Yu, Tea consumption and risk of incident dementia: A prospective cohort study of 377 592 UK Biobank participants, *Translational psychiatry*, 2022, 12, 171.
282. L. Yang, X. Jin, J. Yan, Y. Jin, W. Yu, H. Wu and S. Xu, Prevalence of dementia, cognitive status and associated risk factors among elderly of Zhejiang province, China in 2014, *Age and ageing*, 2016, 45, 708-712.
283. R. P. Gelber, H. Petrovitch, K. H. Masaki, G. W. Ross and L. R. White, Erratum: Coffee intake in midlife and risk of dementia and its neuropathologic correlates (*Journal of Alzheimer's Disease* (2011) 23:4 (607-615) DOI: 10.3233/JAD-2010-101428), *Journal of Alzheimer's Disease*, 2013, 36, 809.
284. Q. H. Wang, Z. X. Zhang, M. N. Tang, Z. Hong, Q. M. Qu, Z. X. Jiang, Z. Y. Yi, Q. H. Zhang and H. Li, Smoking, alcohol and tea drinking on Alzheimer's disease, *Chinese Journal of Neurology*, 2004, 37, 234-238.
